1 Article type: Original Research

2 Research Topic:

3 *Mathematical modelling of the pandemic of 2019 novel coronavirus (COVID-19): Patterns,*  
4 *Dynamics, Prediction, and Control*

5

6

7 **Social heterogeneity drives complex patterns of the COVID-19 pandemic:**  
8 **insights from a novel Stochastic Heterogeneous Epidemic Model (SHEM)**

9

10 Alexander V. Maltsev<sup>1</sup> and Michael D. Stern<sup>2\*</sup>

11

12 <sup>1</sup>Translational Gerontology Branch, National Institute on Aging/NIH, Baltimore, MD, USA

13 <sup>2</sup>Laboratory of Cardiovascular Science, National Institute on Aging/NIH, Baltimore, MD, USA

14

15 \* Correspondence:

16 Michael D. Stern

17 [SternMi@mail.nih.gov](mailto:SternMi@mail.nih.gov)

18

19 **Keywords: COVID-19, SARS-CoV2, infection, stochastic model, hotspots, second wave,**  
20 **social interactions**

21

## 22 **Abstract**

23 In today's absence of a vaccine and impactful treatments, the most effective way to combat the  
24 virus is to find and implement mitigation strategies. An invaluable resource in this task is  
25 numerical modeling that can reveal key factors in COVID-19 pandemic development. On the  
26 other hand, it has become evident that regional infection curves of COVID-19 exhibit complex  
27 patterns which often differ from curves predicted by forecasting models. The wide variations in  
28 attack rate observed among different social strata suggest that this may be due to social  
29 heterogeneity not accounted for by regional models. We investigated this hypothesis by  
30 developing and using a new Stochastic Heterogeneous Epidemic Model (SHEM) that focuses on  
31 subpopulations that are vulnerable in the sense of having an increased likelihood of spreading  
32 infection among themselves. We found that the isolation or embedding of vulnerable sub-clusters  
33 in a major population hub generated complex stochastic infection patterns which included  
34 multiple peaks and growth periods, an extended plateau, a prolonged tail, or a delayed second  
35 wave of infection. Embedded vulnerable groups became hotspots that drove infection despite  
36 efforts of the main population to socially distance, while isolated groups suffered delayed but  
37 intense infection. Amplification of infection by these hotspots facilitated transmission from one  
38 urban area to another, causing the epidemic to hopscotch in a stochastic manner to places it  
39 would not otherwise reach, resembling a microcosm of the situation worldwide as of September  
40 2020. Our results suggest that social heterogeneity is a key factor in the formation of complex  
41 infection propagation patterns. Thus, the mitigation of vulnerable groups is essential to control  
42 the COVID-19 pandemic worldwide. The design of our new model allows it to be applied in  
43 future studies of real-world scenarios on any scale, limited only by computing memory and the  
44 ability to determine the underlying topology and parameters.

## 45 **Introduction**

46 Coronaviruses represent one of the major pathogens that primarily target the human respiratory  
47 system. Previous outbreaks of coronaviruses (CoVs) that affected humans include the severe  
48 acute respiratory syndrome (SARS)-CoV and the Middle East respiratory syndrome (MERS)-  
49 CoV [1]. COVID-19 is a disease caused by the novel coronavirus SARS-CoV-2 virus that is both  
50 fatal and has a high transmission rate ( $R_0$ ), almost twice that of the 2017-2018 common influenza  
51 [2, 3]. The World Health Organization stated that this combination of high health risk and  
52 susceptibility is of great global public health concern, and efforts must be directed to prevent  
53 further infection while vaccines are still being developed [4]. As of November 2020, there are  
54 almost sixty million confirmed COVID-19 cases worldwide and close to confirmed one and a  
55 half million deaths. Older adults seem to be at higher risk for developing more serious  
56 complications from COVID-19 illness [5, 6]. In today's absence of a vaccine and impactful  
57 treatments, the most effective way to combat the virus is to find and implement mitigation  
58 strategies. An invaluable resource in this difficult task is numerical modeling studies that can  
59 reveal key factors in pandemic development.

60       What models could be useful? Direct study of the available data of COVID-19 is  
61 complicated because many cases and deaths are underrepresented. However, a simple model that  
62 correctly captures large-scale behaviors, but gets some details wrong, is useful, whereas a  
63 complicated model that gets some details correct but mischaracterizes the large-scale behaviors  
64 is misleading [7]. Previously, during the H1N1 pandemic, generic (i.e. non-specific) stochastic  
65 influenza models were important to understand and quantify the full effects of the virus in  
66 simulations of important scenarios [8]. Open source stochastic models such as FluTE (2010) or

67 GLEaM (2011) [9, 10] were developed to simulate the spatial interaction and clusterization of  
68 millions of people to discover epidemic patterns.

69 Now, with respect to COVID-19, the FluTE model has recently been used to offer  
70 interventions to mitigate early spread of SARS-CoV-2 in Singapore [11], and GLEaM was  
71 adopted by Chinazzi et al. [12] to model the international propagation of COVID-19 to gain  
72 insight into the effect of travel restrictions on virus spread. Detailed statistical information about  
73 the social interactions and grouping of individuals is difficult to gather, but ultimately can be  
74 used to calibrate the parameters of agent-based models. Such calibrated agent-based models have  
75 been applied to model high-density housing in Brazil and their effect on viral spread to the rest  
76 of the population [13].

77 Despite extensive efforts to understand and predict the COVID-19 spread, the key factors  
78 that determine the multimodal rise patterns, the asymmetry of the recovery phase, and the  
79 emergence of a distinct second wave remain unclear. Therefore, instead of another data-based  
80 forecasting model, we chose to develop a scenario model to study the consequences of a set of  
81 hypothesis-driven conditions in a network of populations. One underexplored but important  
82 factor of pandemic spread is social heterogeneity which defines the degree of dissimilarity in the  
83 behaviors of embedded subpopulations. With regard to virus spread, the important characteristics  
84 of social heterogeneity to consider are levels of clusterization, societal interaction, and disease  
85 mitigation strategies. Our hypothesis is that complex infection curves that consist of multiple  
86 infection peaks and growth periods are the consequence of asynchronous propagation of  
87 infection among groups with widely varying degrees of intra-group interaction and isolation  
88 from main hubs (a metapopulation of infections).

89           To approach this problem, we developed a novel Stochastic Heterogeneous Epidemic  
90 Model (dubbed SHEM) which incorporates heterogeneous aspects of society. We also take into  
91 account over-dispersed stochasticity (super-spreading) [14], which is usually not incorporated  
92 into compartmental models but can be critical in small or virgin populations. The model design  
93 was inspired by our stochastic models of local calcium release dynamics inside heart cells,  
94 driven by explosive calcium-induced-calcium-release [15, 16]. We examine several key  
95 scenarios of heterogeneity where separate communities of various clusterization and  
96 transmission capabilities are linked to a large population hub. The basic reproduction number of  
97 infection ( $R_0$ ) of the bulk of our population was assigned to  $R_0 = 2.5$  which is within the range of  
98 SARS-CoV-2 basic reproduction number based on the early phase of COVID-19 outbreak in  
99 Italy [17]. Interplay of various degrees of heterogeneity and isolation periods in our model  
100 generated various dynamic patterns of infection, including a multi-modal growth periods, an  
101 extended plateau, prolonged tail, or a delayed second wave of infection. Most importantly, we  
102 found that vulnerable social subgroups play a key role in the propagation and unpredictability of  
103 the epidemic, and can defeat efforts at social distancing.

104

## 105 **Methods**

### 106 *Model purpose*

107 In view of the constantly changing behavioral environment for COVID-19 in the United States  
108 and worldwide, data-based predictive modeling of the future of the epidemic is difficult. Our  
109 model is specifically intended to examine the effect of heterogeneity, including not only  
110 geographic but also social heterogeneity, i.e. the existence of groups within one geographic  
111 location that have different social interaction patterns and may be partially isolated from

112 neighboring groups, *e.g.* nursing homes, prisons, campuses. Alternatively, subgroups can be  
113 partially embedded in the main population, *e.g.* meat processing plants or warehouse employees  
114 who are unable to socially distance at work, but spend part of their day in the main community  
115 where they can acquire and amplify infection. The model is fully stochastic and, unlike most  
116 compartmental models, incorporates the effect of over dispersion of secondary infections (super  
117 spreading).

### 118 *Structure of the Model*

119 The general model consists of a number of subpopulations (“villages”) whose number is limited  
120 only by computing memory. The simulation is based on a generalization of the SEIRD  
121 representation. The state of each village is represented by the numbers of individuals in each of 5  
122 states: *Susceptible*, *Exposed* (destined to become infected), *Infected*, *Recovered* (immune) and  
123 *Dead* (however, see below under Super-spreading for additional state-dependence). Each village  
124 is, by definition, homogeneous and mixed. Villages could represent actual geographic units, but  
125 could also be groups or sub-regions that have different social interactions or behavior. The mean  
126 duration of infection (infectious period) was taken to be 7 days and the incubation period 5.5  
127 days.

128 Each village  $J$  is characterized by its population, the expected mortality of virus  
129 infections, and its local value  $R_{INN}(J)$  of the basic reproduction number  $R_0$ .  $R_0$  is defined as the  
130 mean expected number of secondary infections spawned by one infected individual over the  
131 duration of their illness, *if the population were totally susceptible*. It is a property of both the  
132 virus and the behavior of individuals in the population, but is distinct from  $R(t)$ , the realized,

133 time dependent, reproduction number that depends also on the fraction of susceptible individuals  
134 remaining during the epidemic.

135 Villages are connected by a user-specified network of formally unidirectional links along  
136 which infection or individuals can travel at user-specified rates, including links from each village  
137 to itself to represent internal infection/recovery processes. Infection can spread by two  
138 processes: transient contact between groups (*alpha* process) *e.g.* nursing home staff coming  
139 from the city; or actual migration of individuals from one village to another (*beta* process). Each  
140 non-self link is characterized by 4 user-supplied parameters: *alphain* and *alphaout* describe the  
141 degree of transient contact (see below) along or against the direction of the link respectively;  
142 *betain* and *betaout* are rates of migration of individuals (time<sup>-1</sup>).

#### 143 ***Transient Contact (alpha) Process***

144 Infection transmitted by transient contact is modeled as though members of one village  
145 spend some (small) fraction *alpha(in/out)* of their time (*i.e.* of their inter-personal contacts)  
146 “visiting” the opposite village at the other end of the link, adjusted for any mitigations (an  
147 example would be staff working at a nursing home, or meat-packing plant employees, treated as  
148 a separate, high-risk population but living in the surrounding county). The spread of infection in  
149 each direction of the link has two components: (1) exposure of susceptibles by visiting infectious  
150 individuals and (2) exposure of visiting susceptibles in the visited village, who then carry the  
151 infection back to their village. This formulation allows for the possibility that transmission is  
152 asymmetric. The generation of exposure by these “visitors” at home and abroad is scaled so that  
153 each infected individual, generates (in an otherwise susceptible population) his destined number  
154 of secondary cases (see below under super-spreading).

155           This arrangement allows for the possibility that “visitors” from different villages could  
156 cross-infect while visiting a common hub (picture UPS and FEDEX drivers) even if there is no  
157 direct link between them. To represent this process, “virtual links” are generated between pairs  
158 of physical links that meet in a hub (in graph-theory terms these are links of the adjoint graph of  
159 the network). Infection by this indirect process is second-order in the alpha’s so it makes very  
160 little contribution in the case of highly isolated sub-populations (*e.g.* nursing homes, prisons) but  
161 could be important for embedded sub-populations with high contact with the hub. Although  
162 each village is considered homogeneous by definition, further heterogeneity within a village  
163 could be represented by subdividing the population into several “villages” in close mutual  
164 contact via the alpha process (*e.g.* students in a college split into those who go to bars and those  
165 who study alone).

166

### 167 ***Simulation Method***

168 The entire collection of populations is simulated as a single, continuous-time Markov chain  
169 (birth-death process). There are 16 types of possible events associated with each link:

- 170       1) Infection from source to target by transient contact
- 171       2) Infection from target to source by transient contact
- 172       3) Infected individual moves from source to target
- 173       4) Exposed individual moves from source to target
- 174       5) Susceptible individual moves from source to target
- 175       6) Infected individual moves from target to source
- 176       7) Exposed individual moves from target to source



- 177 8) Susceptible individual moves from target to source
- 178 9) Susceptible gets exposed inside village (self-link only)
- 179 10) Exposed converts to infected inside village (self-link only)
- 180 11) Infected recovers inside village (self-link only)
- 181 12) Infected dies inside village (self-link only)
- 182 13) Recovered moves from source to target
- 183 14) Recovered moves from target to source
- 184 15) Susceptible gets vaccinated
- 185 16) Recovered loses immunity

186 The objective of the simulation is to generate a continuous-time sequence of Markov states,  
187 with transition rates determined by the SEIRD equations, modified as described below under  
188 Super Spreading. The algorithm consist of a front-end program that sets up the network of  
189 villages and the rates of spread of infections by the alpha and beta processes, and an engine  
190 module that is called repeatedly by the front-end to walk the Markov scheme under a sequence of  
191 imposed conditions, *e.g.* open, lockdown etc. The operation of the program is described by the  
192 following simplified pseudocode:

```
193 PROGRAM FRONT_END
194 use module simulator
195 read parameter file !nh=number of villages
196     do ih=1,nh
197         initialize village population sizes and states
198         lrlinks(ilink,1:2)=ih !create self-links
199         set r0's for first time period
200     end do
201 !create network
202     lrlinks(ilink,1)=source
203     lrlinks(ilink,2)=target
204     set alphain,alphaout,betain,betaout(ilink)
205     ilink++
206 call episim(...lrlinks..tswitch,yflag) !invoke the engine in simulator module
207 if yflag=false on return then ! t reached a breakpoint
208     change r0's,alphas,betas
209     advance tswitch
```

```
210         call episim again
211     else
212         reached tmax
213         write output history
214     end program front-end
215
216
217 MODULE SIMULATOR
218 contains
219 subroutine episim ! main engine
220 create bidirectional linked infectivity lists
221 !generate virtual links by extending link array
222 do lll=1,nrlinks
223     do ll2=lll,nrlinks ! triangular search for common hubs j3
224         ilink++
225         links(ilink,3)=j3
226         alphav(ilink)=alphain/out(j1)*alphaout/in(j2)
227     end do
228 end do
229 t=0
230 ! main loop
231 do while t<tswitch
232     do over all links
233         do event=1,16 !generate cumulative rates of possible events
234             rtot=rtot+rate(event,link)
235             rtt(jtt)=rtot
236             jtt++
237         end do
238     end do
239     ! rtot is total rate of available markov transitions
240     ! time of next event in Poissant point process
241     time of next event = t-log(random)/rtot !exponential distribution
242     ! choose the actual event link and type:
243     find rtot*random2 in the cumulative array rtt at index jbin
244     jl=(jbin-1)/16+1 ! find which link fired
245     links(jl,1:3) gives the villages at the link ends and/or hub
246     jp=jbin-16*(jl-1) ! remainder points to the event type
247     ! carry out the event
248     if the event creates a new infectious person then
249         k=kranbin(random3,rinn(j),reff) ! personal infectivity
250         push k on the top of infection list of village j
251         inf(j)=inf(j)+k
252     ! inf is the collective infectiousness of village j, plays role of
253     ! (numberinfected)*r0 in SEIRD equations
254     end if
255     if the event removes infectious person by recovery or death then
256         pull k off bottom of infection list
257         inf(j)=inf(j)-k
258     end if
259     if the event is migration of infectious move between tops(most recent) of
260     infection list
261     end if
262
263     if t>tmax then
264         return with yflag=true
265     end if
266
267     if t>tout then
268         record state in kout array
269         increment tout
270     end if
271
272     end do over links
```

```
273 end do while ! continue with time steps until t>tswitch
274     return with yflag=false ! continue to the next simulation period.
275 end subroutine episim
276
277
278 FUNCTION kranbin ! draws random negative binomial integer with mean r0 and
279 dispersion reff.
280
281 end module simulator
282
```

## 283 *Super-spreading*

284 It is known that the distribution of secondary COVID-19 infections generated by a single,  
285 infected individual is over-dispersed (*i.e.* has a long tail compared to the Poisson distribution of  
286 infections expected if transmission were random). Although the average  $R_0$  is estimated to be  
287 2.5-4 in the absence of social distancing mitigations, contact tracing has shown that single  
288 individuals have infected up to a hundred others. This is known as super-spreading events, and  
289 can occur by several possible mechanisms, involving either a predilection of an individual (*e.g.* a  
290 celebrity who travels widely and contacts many other people) or a situation in which individuals  
291 were placed in unusually close contact (*e.g.* a church choir in an indoor location). On the other  
292 hand, the majority of infected individuals do not appear to spread the infection to anyone. It has  
293 been shown [14] that this over-dispersed distribution can be approximated by a negative  
294 binomial distribution, with mean  $R_0$  (by definition) and dispersion parameter  $r \ll 1$ , for example  
295 3 and 0.16. By iterating this distribution for several generations of viral spread, it is found that  
296 the eventual distribution of epidemic size is predicted to be quite different than found for a  
297 hypothetical stochastic transmission by Poisson-distributed secondary infections with the same  
298  $R_0$ . A recent model of contact tracing assumed, based on data from the Netherlands, that the  
299 distribution of number of personal contacts outside the family is distributed as a negative  
300 binomial and used this to generate random changes to infection levels at 1-day intervals [18].

301           Unfortunately, viral generations do not remain synchronous in time, so it is not  
302 straightforward to incorporate super-spreading in a time-dependent epidemic evolution model  
303 except by following the interactions and infections of each individual in the population, as done  
304 for example in the FLUTE simulation for influenza [8]. This is very compute-intensive, but a  
305 more significant objection from our point of view is that it depends on knowing (statistically) the  
306 social interaction groups and travel behavior of the population at a fine-grained scale, and these  
307 have been severely disrupted by mitigation efforts during the current pandemic. It is possible to  
308 try to adjust for these mitigations by calibration against the evolving case data, but this is  
309 difficult. Rather than speculate on these variables, we have developed a modified Markov  
310 scheme that tries to reproduce the observed distribution of secondary infections by replacing  $R_0$   
311 in the event-rate calculations by an infectivity that is itself stochastic. This requires storing a  
312 partial history of individual infections, which makes the actual state-space, considered as a  
313 Markov process, much larger than that in a classic SEIRD model.

314           The stochastic process of infection generation by one infected case is in competition with the  
315 independent stochastic recovery process. In the model, recovery is a Poisson point process with  
316 a rate proportional to the number of infections. If we don't identify individuals, a super-spreader  
317 is likely to be "recovered" before (or after) generating his destined number of infections. To  
318 avoid this, we have adopted the following scheme:

- 319           • In each village  $j$ , at each event, an infectivity  $inf(j)$  is maintained that takes the place of  
320            $k_i * R_0$  in the SEIRD rate equations.
- 321           • Whenever a new infection is created (by conversion of an exposed individual), a random  
322           number  $K$  is drawn from a negative binomial distribution of mean  $R_0$  and dispersion  $r_{eff}$ ,

323 the latter to be determined.  $Inf$  is incremented by  $K$  and the individual infectivity  $K$  is  
 324 placed on the top of a linked list.

325 • Whenever a random recovery event is generated at the above-mentioned rate, the oldest  
 326 individual infectivity is removed from the bottom of the list and subtracted from  $inf$ .

327 . The number of secondary infections actually realized by one infected individual is  
 328 proportional to the actual length of time he remains infectious. Since infections recover in the  
 329 order in which they were created, if there are  $n$  infections active, that lifetime will be the  $n^{\text{th}}$   
 330 waiting time of the Poisson point process whose rate is  $n$  times the mean recovery rate (*i.e.* the  
 331 reciprocal of the mean infection duration). The secondary infections generated by individual  $K$   
 332 are a Poisson point process, which is then convolved with the recovery process to give the  
 333 realized distribution of secondary infections generated by that individual. Further convolving  
 334 that with the negative binomial distribution of  $K$  with mean  $r_0$  and dispersion  $r$  we find:

$$p(j, n) = \frac{n^n \Gamma(n+j) r^r \sum_{k=0}^{\infty} \frac{r_0^k k^j (n+k)^{-n-j} (r+r_0)^{-r-k} \Gamma(r+k)}{\Gamma(k+1)}}{j \Gamma(j) \Gamma(n) \Gamma(r)}$$

335  
 336 as the distribution of the actual, realized number of secondary infections. This is a long-tailed  
 337 probability distribution that can be fit, by an appropriate choice  $r_{eff}$  for the dispersion parameter  $r$   
 338 so as to approximate the empirical negative binomial distribution with  $r=0.16$  over the relevant  
 339 range. With more than a few active infections present, the distribution converges to the limit:

$$p(j, \infty) = \sum_{k=0}^{\infty} \frac{r_0^k k^j e^{-k} r^r (r+r_0)^{-r-k} \Gamma(r+k)}{j \Gamma(j) \Gamma(k+1) \Gamma(r)}$$

340

341 We choose  $r_{eff}$  to give the best least-squares fit on a linear scale for the case  $n=1$ , which is the  
342 most important stochastic case since it governs the chance that a single infected individual can  
343 start an outbreak, and gives the chance that an infected individual causes no secondary  
344 infections,  $p(0,1)=0.62$  similar to the empirical distribution. These distributions are all  
345 normalized and have mean  $R_0$  and differ dramatically from the Poisson distribution (Fig S3,  
346 dashed line) assumed in the classic SEIR model. Larger values of  $n$  are decreasingly important  
347 because the aggregate distribution of the actual infection rate controlled by the sum  $inf$  behaves  
348 similarly to *negbinomial* ( $R_0, n*r$ ) which converges to Poisson, so stochastic effects become less  
349 important once there are many active cases.

### 350 *Super-spreaders vs super-spreading events*

351 Super-spreading can be a property of the individual or of the circumstances. What happens when  
352 an individual infected patient migrates to a new village? Does he keep his identity or does he  
353 assume the infectiousness typical of the local  $R_0$  of his new environment? In the model we can  
354 make the choice, determined by a logical variable SPREADR (default TRUE. controlled in the  
355 demos by the input parameter *spreads*). If SPREADR is true, a migrant keeps his prior  $K$  value  
356 which simply migrates from the top (newest) link to be added to the top of the infection list in  
357 the new village, thereby preserving his infectious lifetime in his new home. If *SPREADR* is false  
358 then the  $K$  value of migrants is re-randomized using the local  $R_0$  and  $r_{eff}$  and the infectivity of  
359 transient visitors in the alpha process is re-scaled to the local value of  $R_0$ . In the current version  
360 of the program, SPREADR is a single variable governing all events, but it could easily be made  
361 specific to individual links to distinguish groups that are vulnerable due to high density in their  
362 home village (e.g. factory or warehouse) versus groups that are intrinsically super-spreaders due  
363 to their individual behavior (celebrities, bar hoppers).

364

## 365 *Software Considerations*

366 The model software is written in Fortran 77/95. The main simulation engine, described above, is  
367 in the form of a single Fortran module SIMULATOR. It is intended to be driven by a front-end  
368 program that sets up the network and scenario. For purpose of these demonstrations, we hand-  
369 coded a front end (epichainF) describing a chain of urban clusters (or a single cluster) connected  
370 by bidirectional travel, each linked to a large set of small subpopulations whose characteristics  
371 differ from the urban cluster. The single Markov-chain structure of the model is intrinsically  
372 serial, and is implemented in a single processor thread. For networks with many nodes and  
373 dense links this can be speeded up about 5-fold with 32 processors by parallelizing an inner loop.

374

## 375 **Results**

### 376 *Simulations of infection in isolated clusters driven by an urban cluster*

377 In the first set of simulations we examined the virus spread in simple hypothetical scenarios with  
378 equal numbers of individuals in urban and isolated populations (Fig 1A, insert). The large urban  
379 cluster was composed of 1 million individuals set to  $R_0=2.5$  (open level, but changing throughout  
380 the simulation). The isolated population consisted of 250 clusters, each with 4000 +/- 500 people  
381 and with the same internal  $R_0=2.5$  that remained constant throughout all simulation stages. The  
382 urban cluster was weakly connected with 0.001% transient contact into the isolated clusters  
383 (*alphainpop*) while isolated clusters had 0.1% contact into the urban cluster (*alphaoutpop*), see  
384 Methods for the definition of transient contact. This can be visualized as a collection of small  
385 suburban neighborhoods or nursing homes that are attempting to isolate themselves from the

386 city. We investigated 4 scenarios, specified below. In each scenario except #1, the urban cluster  
387 closed to  $R_0=1.25$  at  $t=40$  days (closed level, e.g. this was New York City under lockdown, based  
388 on 21% antibody positive tests at the peak [19]).

389 1) No mitigation, i.e. freely expanding pandemic: The large cluster of individuals stays  
390 always open.

391 2) Premature, partial reopening to  $R_0 = 1.9$  at 100 days.

392 3) Moderate lockdown period with full reopening at 225 days to  $R_0 = 2.5$ .

393 4) Long lockdown period with full reopening at 365 days to  $R_0 = 2.5$ .

394 A general tendency throughout all 4 scenarios was that as the lockdown period increased, the  
395 magnitude of the infection decreased but its duration increased. At the same time, the interplay  
396 of the urban cluster and the isolated clusters generated a variety of specific patterns in virus  
397 spread dynamics. In the first “no mitigation” scenario (Fig 1A) the isolated areas generated a  
398 strong second peak at the time when infection in the urban cluster had gone through its peak and  
399 was decaying.-On the other hand, the infection rise in the “premature reopening” scenario (Fig  
400 1B) was multi-modal, and the cumulative peak in isolated clusters happened later than the urban  
401 cluster, creating an apparent plateau in active infection cases from day 175 to 225. The infection  
402 dynamics in the “moderate lockdown” scenario (Fig 1C) was more complex. During the closed  
403 stage (of the urban center), the infection in the urban cluster declined, but the delayed infection  
404 in isolated clusters continued to rise forming an additional peak in total infections (Fig 1E, inset).  
405 Then another peak in total infections emerged in the reopen stage that was generated mainly by  
406 the urban cluster, and then was echoed by the isolated subpopulations. Finally, in the “late  
407 reopening” (Fig 1D) scenario, infection decreased during the first wave in both urban and  
408 isolated clusters but a distinct delayed second wave of infection occurred.



409 We also performed a control simulation to validate that heterogeneity of isolated clusters is  
410 indeed important for the infection pattern. In the most complex scenario of “moderate lockdown”  
411 shown in Figure 1C we substitute 250 clusters by one big cluster with the same population of one  
412 million people keeping all other parameters the same. The simulations showed a different pattern  
413 in which the second big cluster always generated a peak of substantially larger amplitude (Fig  
414 S1).

415

#### 416 *Simulations of integrated clusters driving infection in an urban cluster*

417 By altering parameters in the same topology as Figure 1A, we found that the outlying  
418 clusters, if they are unable to socially distance, can become potential “hotspots” that can drive  
419 the infection in the urban population even against efforts of the latter to lock down. In this  
420 scenario the large urban cluster was composed of 1 million individuals with  $R_0 = 1.25$  throughout  
421 all simulation stages while the highly susceptible population consists of 250 clusters each with  
422 1200 +/- 500 people and internal  $R_0 = 3.0$  that are partially embedded in the urban cluster. This  
423  $R_0$  value is based on data from four districts in Germany when essential manufacturing sectors  
424 were open – 95%-prediction interval: 2.16 – 3.73 [20]. The potential hotspot clusters were  
425 connected with 20% out-coupling into the urban cluster ( $\alpha_{outpop} = 0.20$ , see Methods).  
426 This mechanism of transient contact implements short-term movement of the same people in and  
427 out regularly, which does not dilute the effect of the conditions in hotspots the way that random  
428 bidirectional migration would. In other words, the same people “virtually” move back and forth  
429 but spend most of their time in the high-  $R_0$  locations where the infection regenerates. In this  
430 scenario, the small number of infections in the urban area are picked up by hotspots, amplified,

431 and then drive a wave of infection among the urban population despite their efforts to keep their  
432 internal  $R_0$  at 1.25 by social distancing.

433 We performed 10 runs of these simulations which demonstrated that the integrated  
434 clusters drove infection in the urban cluster as shown in a typical example in Fig 2A, B, leading  
435 the late appearance of the epidemic in places that had seen few cases in a microcosm of the  
436 pattern. In the second “chain” topology multiple small urban areas (population 100K each) are  
437 sequentially connected and 30 potential hotspots with  $R_0=2.0$  drive infection within each urban  
438 cluster and facilitate propagation from cluster to cluster (Fig 3, Fig S2, and Movie S2 show the  
439 stochastic dynamics of individual hotspots). In this model, the first urban cluster began with  $R_0 =$   
440 2.5, then locked down to 1.25 at day 40, while the unsuspecting urban clusters connected through  
441 the chain kept  $R_0 = 1.25$  throughout, signifying efforts at social distancing. Ultimately these  
442 efforts were defeated by the hotspots picking up the small number of arriving infections and  
443 amplifying them. These results demonstrate that subgroups who cannot or will not socially  
444 distance can drive the propagation of the epidemic to new regions against the best efforts of the  
445 majority of the populations. It follows that it is possible to control the spread of the epidemic  
446 through the mitigation of hotspot amplification. To validate this finding, we simulate the  
447 application of vaccine treatments to *just* the hotspot members, who constitute only about 30% of  
448 the population. The vaccine treatment is applied to individuals in hotspots at the rate of 5% per  
449 day, and, as a result, the geographic spread of infection is sufficiently stopped and the entire  
450 downstream region is protected from infection and deaths (Fig 4).

451

452 ***Reopening urban cluster after hotspots drive first wave of infection***

453 We extended the single urban cluster hotspot scenario to reopen when infection numbers  
454 substantially drop. Here, the main cluster was composed of 1 million individuals which starts off  
455 closed with  $R_0=1.05$  and reopens to  $R_0=2.50$  at day 360. The cluster was connected to 30  
456 potential hotspots each with 1200 +/- 500 people with  $R_0=3.0$  which remained constant  
457 throughout all simulation stages. The urban cluster was connected with 0.1% transient contact  
458 into the isolated clusters (*alphainpop*) while isolated clusters had 1% contact into the urban  
459 cluster (*alphaoutpop*). The results show two distinct waves of infection (Fig 5). The hotspots  
460 drove the first wave of infection, whereas the second wave was almost entirely composed of  
461 infection from the urban area, demonstrating that the hotspots acquired immunity and did not  
462 participate at all in the second wave. The ending of the first wave, dominated by the vulnerable  
463 groups, created the illusion that the epidemic was nearly over, while a large fraction of the  
464 surrounding populations was in fact still susceptible when reopening occurred.

465

## 466 **Discussion**

### 467 *Interpretations and implications*

468 Since Summer of 2020, the infection curves of the COVID-19 pandemic in various locations  
469 have been very different from standard smooth bell curves. Here we tested the hypothesis that  
470 multiple, asynchronous waves and plateaus are in part due to stochasticity and heterogeneity, as  
471 well as due to changing efforts at mitigation. Geographic heterogeneity is included in forecasting  
472 models [12, 21, 22] which use extensive, public databases of population characteristics and travel  
473 patterns, but these do not fully account for the stratification of social behaviors that controls the  
474 spread of the virus. Therefore, instead of building another data-based forecasting and estimation  
475 model, we developed a numerical scenario model that we used to explore mechanisms of

476 infection dynamics with regards to social stratification. The model was built as a network of  
477 “populations” which represent social and behavioral strata of geographic populations. Our model  
478 can be considered a metapopulation of SARS-CoV2, when a single species is spread among  
479 different environments that determine its local survival or extinction.

480 We examined several scenarios which included one or more large urban populations  
481 connected to vulnerable subgroups that are unable/unwilling to socially distance and thus  
482 represent potential COVID-19 hotspots. Depending on the degree of interaction, these subgroups  
483 were either driven by infection from the main population, or acted as major drivers of the  
484 epidemic. Isolated subpopulations were infection-driven (*e.g.* nursing homes, prisons, remote  
485 suburbs, clustered religious groups) and had a substantially delayed contribution to total  
486 infection cases, ultimately forming an infection curve which could include multi-modal growth  
487 periods, an extended plateau, a prolonged tail, or a delayed second wave of infection (Fig 1).  
488 These communities, due to their isolated nature, had low herd immunity that put them at risk for  
489 explosive scenarios when basic mitigation strategies were not implemented. Alternatively,  
490 partially integrated subpopulations were driving infection (*e.g.* employees of factories,  
491 warehouses, meat packing plants, church groups, campuses, shelters, and other essential  
492 workers) in its connected urban population by picking up infection and amplifying it by (Fig 2,  
493 movie S1). We found that these “hotspots” ignite infection even in a locked down population,  
494 ultimately propagating and igniting other isolated populations (Fig 3, movie S2). The locked  
495 down population however does not acquire herd immunity, as opposed to the hotspots, and thus  
496 when lockdown is lifted, a second wave is generated by the main cluster (Fig 5).

497 There are several implications that arise from our results. We can expect social  
498 heterogeneity to form delayed local asynchronous epidemics, creating a variety of infection

499 profiles in various regions over time, prolonging the pandemic time span, and spreading to new  
500 areas unpredictably due to the stochasticity of infection in small subgroups, as is becoming  
501 increasingly obvious in the United States in the Fall of 2020 Effective mitigation of the epidemic  
502 in the main population requires close attention to vulnerable subgroups in order to prevent the  
503 formation of COVID-19 infection hotspots. Otherwise vulnerable subgroups that cannot  
504 implement mitigation strategies spread infection to the socially distanced populations, defeating  
505 their efforts at mitigation. Despite hotspots possibly acquiring immunity, there still exists a threat  
506 of a second wave of infection in the socially distanced main population. Thus, an effective  
507 treatment or vaccination needs to be developed prior to full reopening. As vaccines become  
508 readily available, the selection and timing of their administration will be an important policy  
509 consideration. Our simulations in idealized scenarios (Fig 4) suggest that focusing vaccination on  
510 the small fraction of the population that is unable or unwilling to socially distance may be  
511 sufficient to interrupt regional spread and protect a much wider fraction of the public. Notably,  
512 achieving this effect requires vaccinating all hotspot groups, not merely medical personnel, and  
513 essential workers, but also uncooperative college students and those with an aversion to  
514 mitigations. This creates a kind of moral hazard – rewarding bad behavior – but the model  
515 suggests that it is the public interest.

516

### 517 *Comparison with other studies*

518 While our study is focused on vulnerable subpopulations in pandemic development, there are  
519 other important factors regarding social heterogeneity identified by previous studies.

520 The study by Dolbeault et al. [23], using their multi-group SEIR model, underlined the

521 importance of mitigation measures on single individuals with a high level of social interactions.

522 Indeed, their study showed that even a small group of individuals with high transmission rate can  
523 trigger an outbreak even if the  $R_0$  of the majority is below 1. Althouse et al. [14] identified and  
524 explored in depth another important factor, explosive super-spreading events originating from  
525 long-term care facilities, prisons, meat-packing plants, fish factories, cruise ships, family  
526 gatherings, parties and night clubs. This study further demonstrated the urgent need for targeted  
527 interventions as routes of effective virus transmission. Taking into account the importance of  
528 these super-spreading events and individuals, they were included in the design of our model (see  
529 Methods, Super-spreading) to generate more realistic outcomes of scenarios.

530 With regard to agent-based models, Chinazzi et al. [12] used GLEaM to demonstrate that  
531 travel restrictions introduced in Wuhan in January 2020 only delayed epidemic progression by 3  
532 to 5 days within China, and international travel restrictions only helped slow infectious spread  
533 until mid-February. Our simulations of COVID-19 spread also show that ultimately, when  
534 enough time goes by, isolation does not prevent infection of vulnerable subpopulations (Fig 1).  
535 Chinazzi et. al. suggests that early detection, hand washing, self-isolation, and household  
536 quarantine are more effective than travel restrictions at mitigating this COVID-19 pandemic. Our  
537 recommendations are in accord, and we advocate for communities to take extra care of  
538 vulnerable subpopulations internally, as so to prevent a possible hotspot formation that may  
539 evolve into a regional epidemic.

540

#### 541 *Model features, limitations, and future studies*

542 An epidemic can be likened to a forest fire, which spreads by diffusion along a front, but can also  
543 jump by embers that may or may not start a new blaze. Such spread to virgin areas, with a virus  
544 as with a fire, is intrinsically stochastic and such stochasticity, which is not explicitly included in

545 mean-field models, may contribute to the remarkable patchiness of the COVID-19 epidemic.  
546 This has caused the epidemic to appear entirely different to observers in different locations,  
547 leading to politicization of the response, which is, itself, a form of social heterogeneity. For rare  
548 spread to small, isolated subgroups (embers) this stochasticity is crucial. Patchiness is aggravated  
549 by the over-dispersion (super-spreading) of secondary cases of COVID-19, where the majority of  
550 infected individuals do not spread the virus, but some can cause up to a hundred secondary  
551 infections [14]. Our model is explicitly stochastic, with a mechanism to account for over-  
552 dispersion, by keeping a partial history of individual infections. Furthermore, the design of our  
553 new model allows it to be applied in future studies of real-world scenarios on any scale, limited  
554 only by memory and the ability to determine the underlying topology and parameters.

555         However in our model, we make no attempt to distinguish between symptomatic and  
556 asymptomatic cases, despite recent findings by Chao et al. [24] in their agent-based model  
557 (dubbed Corvid) that demonstrated that most infections actually originate from pre-symptomatic  
558 people. Since the relative infectivity of symptomatic and non-symptomatic is uncertain, there is  
559 no direct way to accurately determine the number of asymptomatic infections at present. Such a  
560 distinction (included in a number of other models) could easily be added by subdividing the 5  
561 compartments, at the risk of added complexity and more parameters needed in a scenario.

562         We did not take into account recent suggestions that infectivity is concentrated in a short  
563 time window just before and after symptom onset. Instead, we used the standard SEIRD  
564 assumption that infections are generated throughout the period of infection, using a mean clinical  
565 duration of 7 days. The model does not consider the physical mechanisms of transmission of  
566 COVID-19, or the possibility that many recovered patients do not quickly re-enter their normal

567 social circles, delaying herd immunity. An additional compartment, with a pipeline mechanism,  
568 could also be added to account for this.

569         We examined several simple scenarios as a demonstration of our model, which revealed  
570 the important role of embedded, non-distancing sub-populations in infection propagation. Further  
571 studies require consideration of the role of model network topology. Several studies have shown  
572 that epidemic propagation in large, scale-free networks can result in the establishment of an  
573 endemic state even with small infection rates, preventing random vaccination from effectively  
574 ending the epidemic [25, 26]. Strictly speaking this cannot happen in the scenarios we  
575 considered, which assumed that recovered individuals are permanently immune – a choice we  
576 made because of the extreme rarity of re-infections with SARS-CoV-2. A more important point  
577 is that prior theoretical analyses pertained to networks of individuals, each of whom can be either  
578 infected or susceptible. Within a single population cluster, over-dispersed link distributions such  
579 as in scale-free networks can enable persistence of infection because highly connected  
580 individuals can scavenge rare infections and widely redistribute them [27]. This is a major  
581 mechanism of super-spreading, which is incorporated in our model by heuristically handling  
582 super-spreading in each homogeneous cluster. However, stratification of the connectivity of  
583 individuals is not included in the model: Individual villages were taken to be homogeneous,  
584 characterized by their populations,  $R_0$  and  $r_{\text{eff}}$  that determine the effective dispersion of  
585 secondary infections. Further stratification of individual connectivity could be handled by  
586 splitting social behavior into separate, mutually embedded clusters e.g. college students who  
587 study together vs. those who study alone



588           It requires further studies to see if similar topological considerations pertain to networks  
589 of populations as in our model. With that in mind, the model includes the possibility that a  
590 recovered individual may revert to being susceptible, with a specified rate constant. How the  
591 topology of the larger-scale network of populations affects the propagation of the virus requires  
592 simulation studies too extensive to be considered in this paper. For example, whether physical  
593 transportation and communication networks are scale-free is controversial [28-30]. In our  
594 preliminary simulations (not shown), we found that a scale-free random network of 500 villages  
595 with populations proportional to the link numbers, and uniform behavior, had a significant  
596 probability of entering an endemic state even when the lifetime of immunity was as long as 500  
597 days. However, the same was true of Erdős-Rényi random networks with a similar number of  
598 links. Interestingly, both types of random networks produced smooth single-peak epidemics  
599 resembling a single population suggesting that the increasingly complex patterns now being  
600 observed do depend on behavioral heterogeneity.

601

602

603

## 604 **Data Availability Statement**

605 The raw data supporting the conclusions of this article will be made available by the authors,  
606 without undue reservation.

607

## 608 **Conflict of Interest**

609 The authors declare that the research was conducted in the absence of any commercial or  
610 financial relationships that could be construed as a potential conflict of interest.

611

## 612 **Author Contributions**

613 All authors listed have made a substantial, direct and intellectual contribution to the work, and  
614 approved it for publication.

615

## 616 **Funding**

617 The work was supported by the Intramural Research Program of the National Institute on Aging,  
618 National Institutes of Health.

619

## 620 **Acknowledgments**

621 This manuscript has been released as a pre-print at

622 <https://www.medrxiv.org/content/10.1101/2020.07.10.20150813v3> [31]. This study utilized the

623 high-performance computational capabilities of the Biowulf Linux cluster at the National

624 Institutes of Health, Bethesda, MD. (<https://hpc.nih.gov/>)

625

## 626 References

- 627 1. Rothan HA, Byrareddy SN. The epidemiology and pathogenesis of coronavirus disease  
628 (COVID-19) outbreak. *J Autoimmun.* (2020) 109:102433. doi: 10.1016/j.jaut.2020.102433
- 629 2. Xiaofang F, Yuqing Z, Jie W, Xiaoxiao L, Cheng D, Chenyang H, et al. A Severe  
630 Seasonal Influenza Epidemic During 2017–2018 in China After the 2009 Pandemic Influenza: A  
631 Modeling Study. *Infectious Microbes & Diseases.* (2019) 1:20-6. doi:  
632 10.1097/IM9.000000000000006
- 633 3. Liu Y, Gayle AA, Wilder-Smith A, Rocklöv J. The reproductive number of COVID-19 is  
634 higher compared to SARS coronavirus. *J Travel Med.* (2020) 27. doi: 10.1093/jtm/taaa021
- 635 4. World-Health-Organization. Coronavirus disease 2019 (COVID-19) Situation Report –  
636 72. (2020):[https://apps.who.int/iris/bitstream/handle/10665/331685/nCoVsitrep01Apr2020-](https://apps.who.int/iris/bitstream/handle/10665/331685/nCoVsitrep01Apr2020-eng.pdf)  
637 [eng.pdf](https://apps.who.int/iris/bitstream/handle/10665/331685/nCoVsitrep01Apr2020-eng.pdf).
- 638 5. Liu K, Chen Y, Lin R, Han K. Clinical features of COVID-19 in elderly patients: A  
639 comparison with young and middle-aged patients. *J Infect.* (2020) 80:e14-e8. doi:  
640 10.1016/j.jinf.2020.03.005
- 641 6. Li P, Chen L, Liu Z, Pan J, Zhou D, Wang H, et al. Clinical features and short-term  
642 outcomes of elderly patients with COVID-19. *Int J Infect Dis.* (2020) 97:245-50. doi:  
643 10.1016/j.ijid.2020.05.107
- 644 7. Siegenfeld AF, Taleb NN, Bar-Yam Y. Opinion: What models can and cannot tell us  
645 about COVID-19. *Proceedings of the National Academy of Sciences.* (2020):202011542. doi:  
646 10.1073/pnas.2011542117
- 647 8. Chao DL, Halloran ME, Obenchain VJ, Longini IM, Jr. FluTE, a publicly available  
648 stochastic influenza epidemic simulation model. *PLoS Comput Biol.* (2010) 6:e1000656. doi:  
649 10.1371/journal.pcbi.1000656
- 650 9. Van den Broeck W, Gioannini C, Goncalves B, Quaggiotto M, Colizza V, Vespignani A.  
651 The GLEaMviz computational tool, a publicly available software to explore realistic epidemic  
652 spreading scenarios at the global scale. *BMC Infect Dis.* (2011) 11:37. doi: 10.1186/1471-2334-  
653 11-37
- 654 10. Balcan D, Goncalves B, Hu H, Ramasco JJ, Colizza V, Vespignani A. Modeling the  
655 spatial spread of infectious diseases: the GLobal Epidemic and Mobility computational model. *J*  
656 *Comput Sci.* (2010) 1:132-45. doi: 10.1016/j.jocs.2010.07.002
- 657 11. Koo JR, Cook AR, Park M, Sun Y, Sun H, Lim JT, et al. Interventions to mitigate early  
658 spread of SARS-CoV-2 in Singapore: a modelling study. *Lancet Infect Dis.* (2020) 20:678-88.  
659 doi: 10.1016/S1473-3099(20)30162-6
- 660 12. Chinazzi M, Davis JT, Ajelli M, Gioannini C, Litvinova M, Merler S, et al. The effect of  
661 travel restrictions on the spread of the 2019 novel coronavirus (COVID-19) outbreak. *Science.*  
662 (2020) 368:395-400. doi: 10.1126/science.aba9757
- 663 13. Klôh V, Silva G, Ferro M, Araújo E, Melo C, Andrade Lima JRP, et al. The virus and  
664 socioeconomic inequality: An agent-based model to simulate and assess the impact of  
665 interventions to reduce the spread of COVID-19 in Rio de Janeiro, Brazil. *Brazilian Journal of*  
666 *Health Review.* (2020) 3:647-3673.
- 667 14. Althouse BM, Wenger EA, Miller JC, Scarpino SV, Allard A, Hébert-Dufresne L, et al.  
668 Stochasticity and heterogeneity in the transmission dynamics of SARS-CoV-2. *arXiv [Preprint].*  
669 (2020):<https://arxiv.org/abs/2005.13689>.
- 670 15. Stern MD, Maltseva LA, Juhaszova M, Sollott SJ, Lakatta EG, Maltsev VA. Hierarchical  
671 clustering of ryanodine receptors enables emergence of a calcium clock in sinoatrial node cells.  
672 *J Gen Physiol.* (2014) 143:577-604. doi: 10.1085/jgp.201311123

- 673 16. Maltsev AV, Maltsev VA, Stern MD. Clusters of calcium release channels harness the  
674 Ising phase transition to confine their elementary intracellular signals. *Proc Natl Acad Sci U S A*.  
675 (2017) 114:7525-30. doi: 10.1073/pnas.1701409114
- 676 17. Rahman B, Sadraddin E, Porreca A. The basic reproduction number of SARS-CoV-2 in  
677 Wuhan is about to die out, how about the rest of the World? *Rev Med Virol*. (2020):e2111. doi:  
678 10.1002/rmv.2111
- 679 18. Kretzschmar ME, Rozhnova G, Bootsma MCJ, van Boven M, van de Wijert J, Bonten  
680 MJM. Impact of delays on effectiveness of contact tracing strategies for COVID-19: a modelling  
681 study. *Lancet Public Health*. (2020) 5:e452-e9. doi: 10.1016/S2468-2667(20)30157-2
- 682 19. Schultz C. More than one in five people who were tested for virus antibodies in N.Y.C.  
683 had them. *The New York Times*.  
684 (2020):<https://www.nytimes.com/2020/04/23/nyregion/coronavirus-new-york-update.html>.
- 685 20. The-Robert-Koch-Institute. COVID-19 Situation Report 21/06/2020.  
686 (2020):[https://www.rki.de/DE/Content/InfAZ/N/Neuartiges\\_Coronavirus/Situationsberichte/2020-](https://www.rki.de/DE/Content/InfAZ/N/Neuartiges_Coronavirus/Situationsberichte/2020-06-21-en.pdf)  
687 [06-21-en.pdf](https://www.rki.de/DE/Content/InfAZ/N/Neuartiges_Coronavirus/Situationsberichte/2020-06-21-en.pdf).
- 688 21. Friston KJ, Parr T, Zeidman P, Razi A, Flandin G, Daunizeau J, et al. Second waves,  
689 social distancing, and the spread of COVID-19 across America. *arxiv [Preprint]*.  
690 (2020):<https://arxiv.org/abs/2004.13017>.
- 691 22. Pei S, Kandula S, Shaman J. Differential Effects of Intervention Timing on COVID-19  
692 Spread in the United States. *medRxiv [Preprint]*. (2020). doi: 10.1101/2020.05.15.20103655
- 693 23. Dolbeault J, TURINICI G. Social heterogeneity and the COVID-19 lockdown in a multi-  
694 group SEIR model. *medRxiv [Preprint]*. (2020). doi: 10.1101/2020.05.15.20103010
- 695 24. Chao DL, Oron AP, Srikrishna D, Famulare M. Modeling layered non-pharmaceutical  
696 interventions against SARS-CoV-2 in the United States with Corvid. *medRxiv [Preprint]*. (2020).  
697 doi: 10.1101/2020.04.08.20058487
- 698 25. Pastor-Satorras R, Vespignani A. Immunization of complex networks. *Phys Rev E Stat*  
699 *Nonlin Soft Matter Phys*. (2002) 65:036104. doi: 10.1103/PhysRevE.65.036104
- 700 26. Pastor-Satorras R, Vespignani A. Epidemic dynamics in finite size scale-free networks.  
701 *Phys Rev E Stat Nonlin Soft Matter Phys*. (2002) 65:035108. doi: 10.1103/PhysRevE.65.035108
- 702 27. Ding Q, Li W, Hu X, Zheng Z, Tang S. The SIS diffusion process in complex networks  
703 with independent spreaders. *Physica A: Statistical Mechanics and its Applications*. (2020)  
704 546:122921. doi: 10.1016/j.physa.2019.122921
- 705 28. Zhang L, Zeng G, Li D, Huang HJ, Stanley HE, Havlin S. Scale-free resilience of real  
706 traffic jams. *Proc Natl Acad Sci U S A*. (2019) 116:8673-8. doi: 10.1073/pnas.1814982116
- 707 29. Kocur-Bera K. Scale-free network theory in studying the structure of the road network in  
708 Poland. *Promet - Traffic - Traffico*. (2014) 26:235-42. doi: 10.7307/ptt.v26i3.1316
- 709 30. Broido AD, Clauset A. Scale-free networks are rare. *Nat Commun*. (2019) 10:1017. doi:  
710 10.1038/s41467-019-08746-5
- 711 31. Maltsev AV, Stern M. Social heterogeneity drives complex patterns of the COVID-19  
712 pandemic: insights from a novel Stochastic Heterogeneous Epidemic Model (SHEM). *medRxiv*  
713 *[Preprint]*. (2020). doi: 10.1101/2020.07.10.20150813

714

715

716 **Figure legends**

717

718 **Fig 1: Complex dynamic patterns of SARS-CoV2 infection in simulations in a**

719 **heterogeneous society when infection in isolated clusters are ignited by an urban cluster**

720 **implementing various lockdown strategies. (A)** isolated clusters generate a second delayed

721 peak when no intervention is implemented. Inset schematically illustrates the society structure in

722 this scenario. Contributions are shown by different colors. **(B)** an apparent plateau after early

723 reopening and complex rise pattern during close period (inset). Green shade shows the lockdown

724 periods. **(C)** A multimodal rise (inset) with additional peak generated by rural cluster after full

725 reopening at day 225. **(D)** A delayed second wave emerged after full reopening at day 365. **E,**

726 The dynamics of total number of deaths in each scenario.

727

728 **Fig 2: Highly susceptible integrated clusters (hotspots) drive SARS-CoV2 infection in an**

729 **urban cluster. (A and B)** Initial rise of infection in hotspot clusters is followed by the infection

730 in urban cluster with a delay of about 30 days. Y-axis represents active infections in %

731 population reflecting for hotspots (red line) the ratio of all active cases in all hotspots to entire

732 population of all 250 hotspots. Inset shows schematically the society structure in this scenario.

733 **(C)** Infection in individual hotspots (multiple colors) substantially fluctuates in terms of time of

734 ignition and magnitude from the mean (red bold curve). See also Movie S1. **(D)** Explosive

735 infection in hotspots within locked urban cluster substantially increased the peak of infection in

736 the entire society and shifted it towards much earlier occurrence from about 400 days to 200

737 days. Shown are 10 simulation runs for each scenario.

738

739 **Fig 3: Complex infection propagation patterns in multiple urban areas containing hotspots.**

740 (A) Schematic illustration of the heterogeneous society used in simulations. (B) Total infection  
741 count oscillates as infection propagates. While individual oscillations exhibit substantial  
742 variations in timing and amplitude, the patterns remain the same (i.e. 4 oscillations, reflecting  
743 infection surge in each urban cluster). (C) The infection in hotspots is delayed before the  
744 lockdown at day 40, but then is always in the lead (red curves), driving infection in each urban  
745 cluster (blue curves) and facilitating infection propagation among clusters (Movie S2).

746

747 **Fig 4: Multicity model as in figure 3 without (A) and with (B) vaccination of only the**  
748 **hotspot populations at a rate of 5% of the population per day, starting at day 150.**

749 Vaccination of hotspot individuals prevents geographic spread of the virus even though they are  
750 only about 1/3 of the population, thereby protecting the general population. The colored curves  
751 show only the infections among the socially distanced majority of the city population. (C)  
752 Overall mortality with and without vaccine, assuming case mortality of 1% in all groups.

753

754 **Fig 5: Second wave in the hotspot scenario.** Urban cluster generates a second wave of infection  
755 when it reopens from  $R_0=1.05$  to  $R_0=2.50$  on day 360 (green line), whereas hotspots with  $R_0=3.0$   
756 (red line) have acquired immunity in the first wave and do not participate in the second wave.

757

758

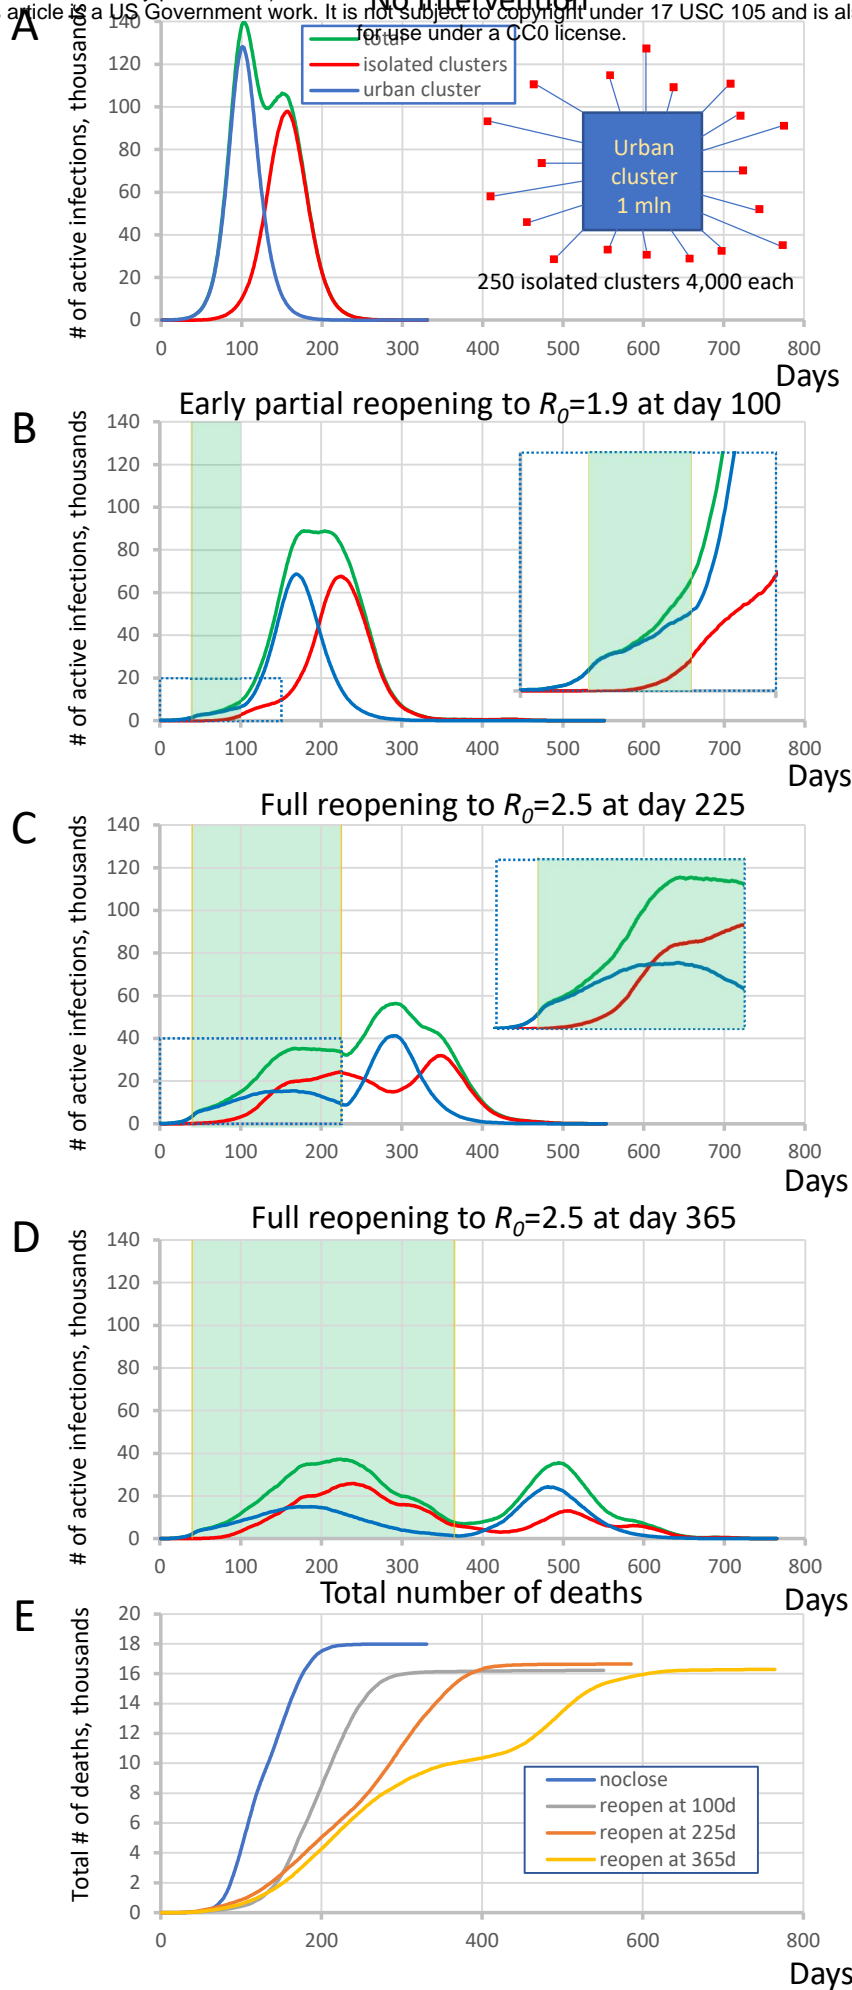

Figure 1

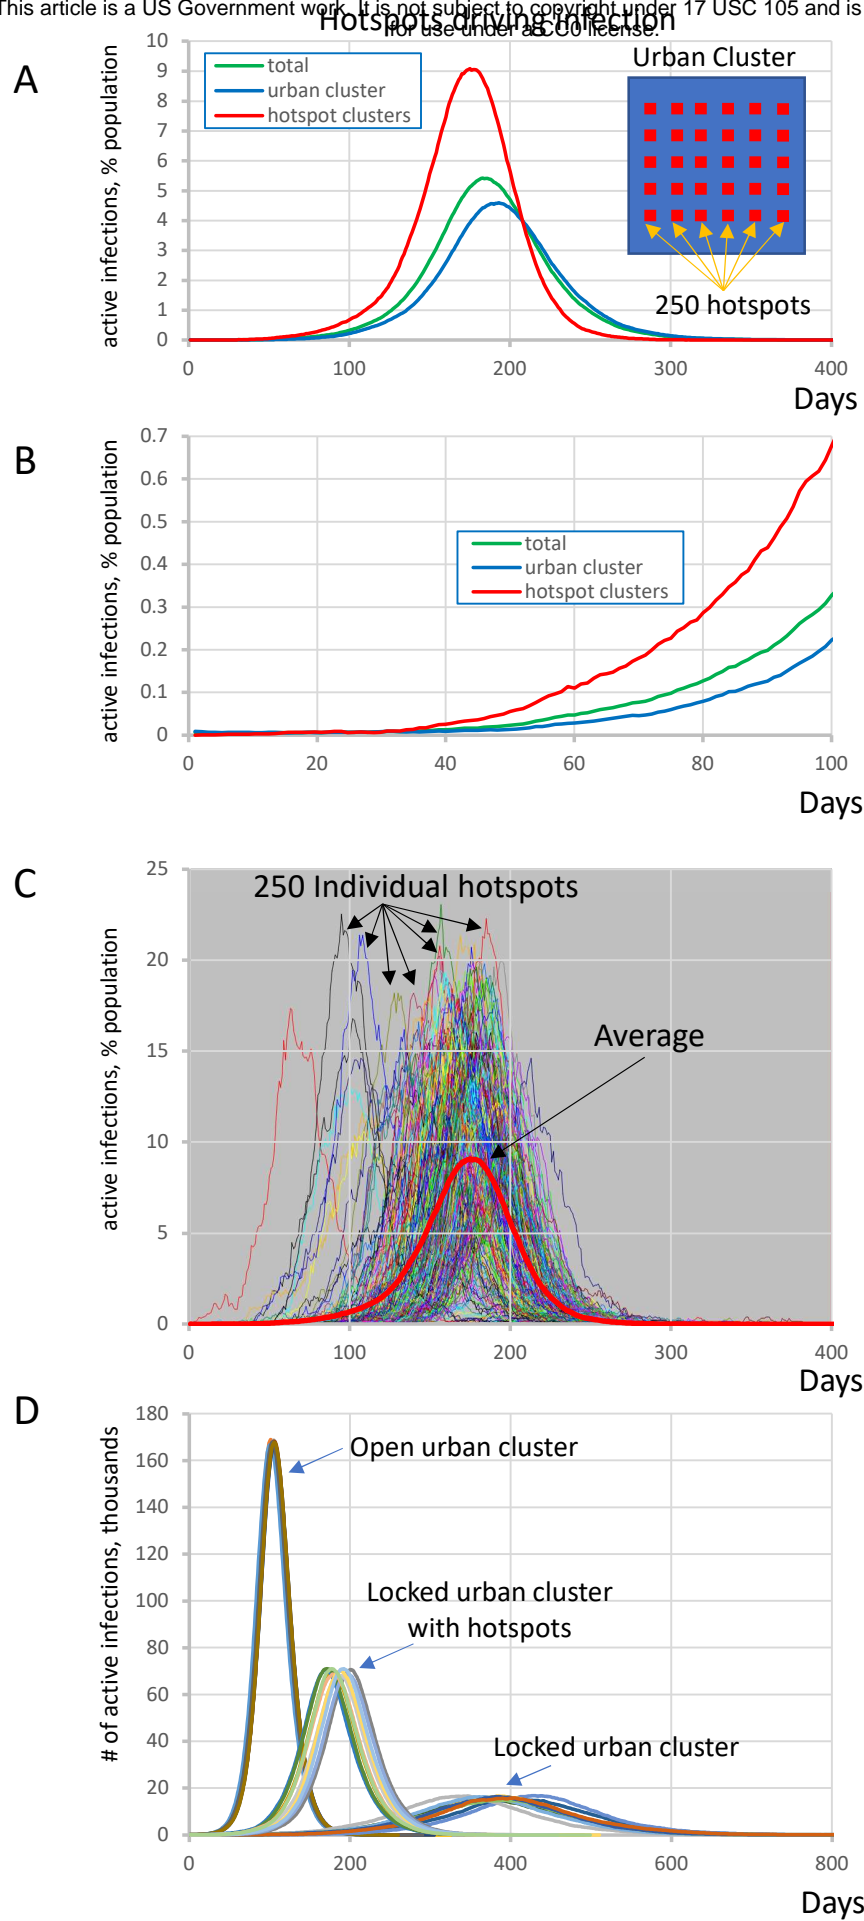

Figure 2



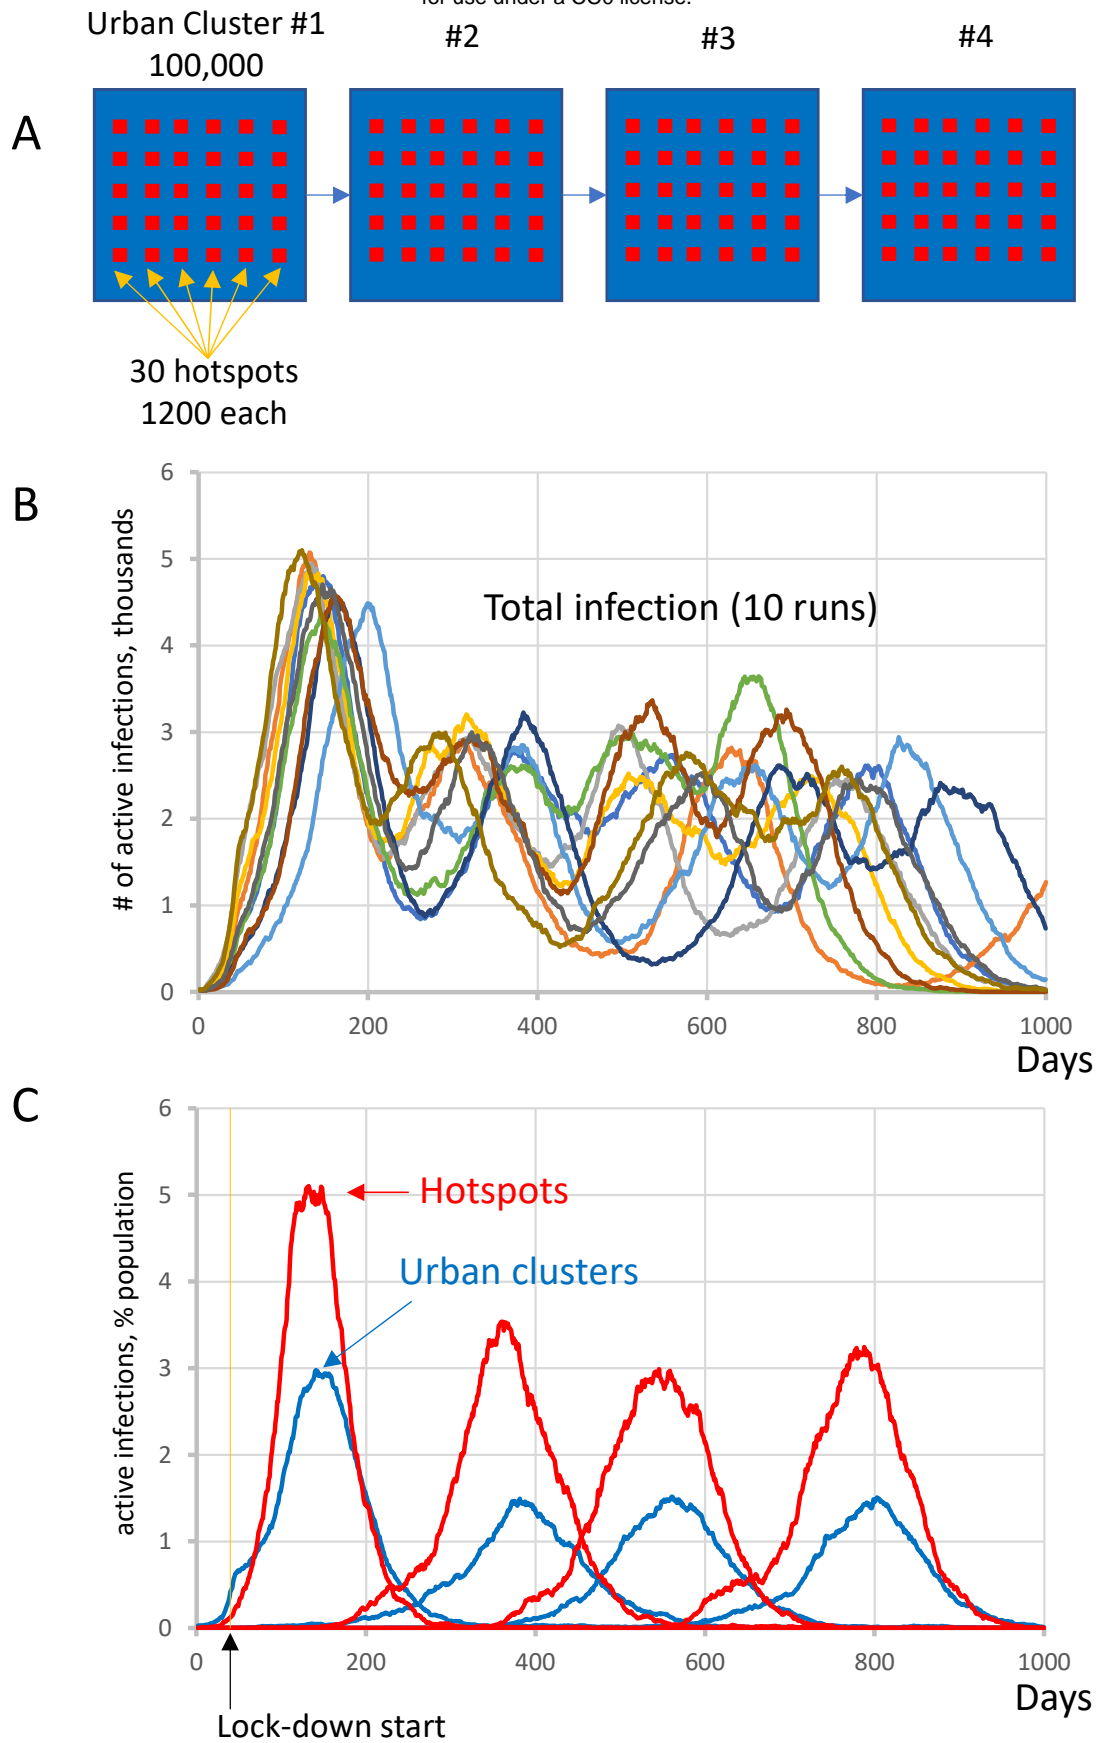

Figure 3

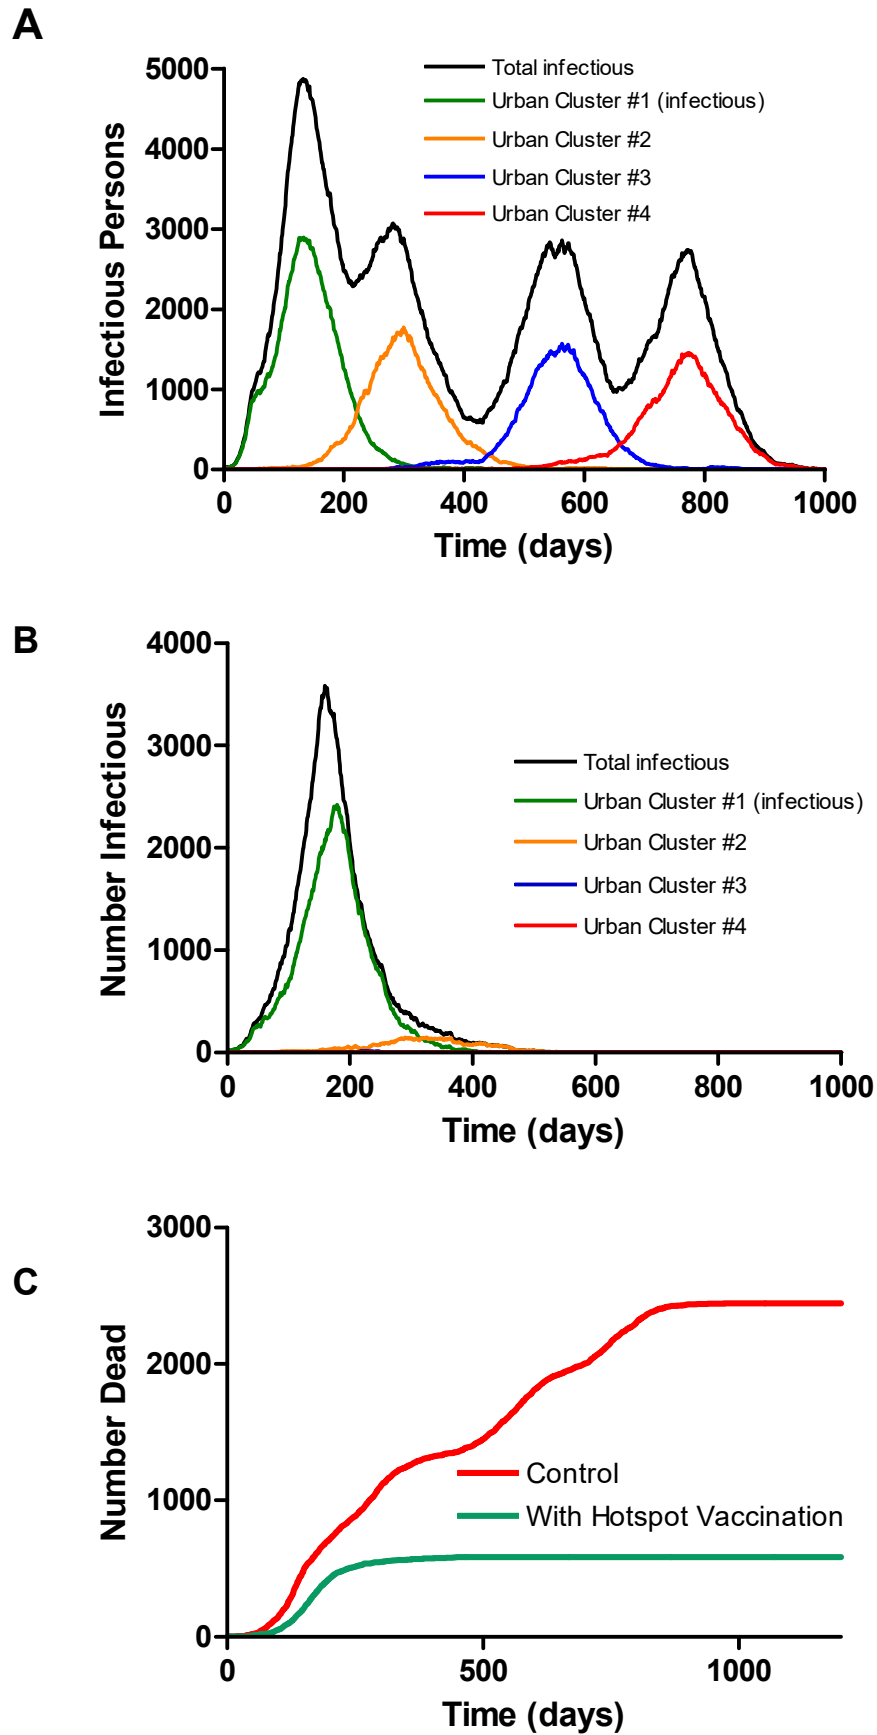

Urban cluster closed to  $R_0=1.05$  at day 0 and reopens to  $R_0=2.5$  at day 360

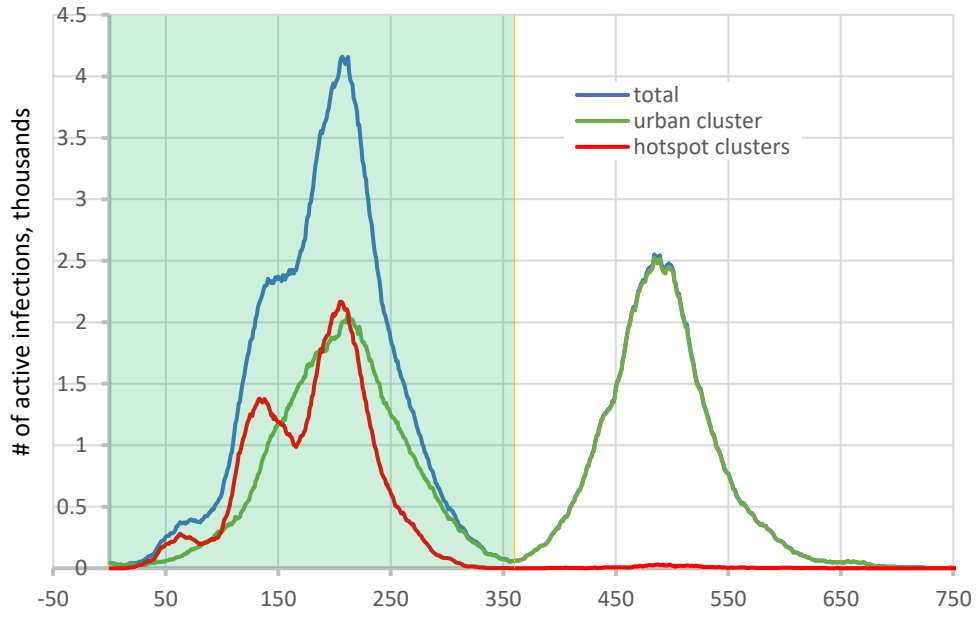

Figure 5

Supplementary Material for

**Social heterogeneity drives complex patterns of the COVID-19 pandemic: insights  
from a novel Stochastic Heterogeneous Epidemic Model (SHEM)**

Alexander V. Maltsev and Michael D. Stern\*

*\*Corresponding Author:*

Michael D. Stern,

Email: [SternMi@mail.nih.gov](mailto:SternMi@mail.nih.gov)

**This PDF file includes:**

Figures S1 – S3  
Legends for Movies S1 and S2

**Other supplementary materials for this manuscript include the following:**

Movies S1 and S2

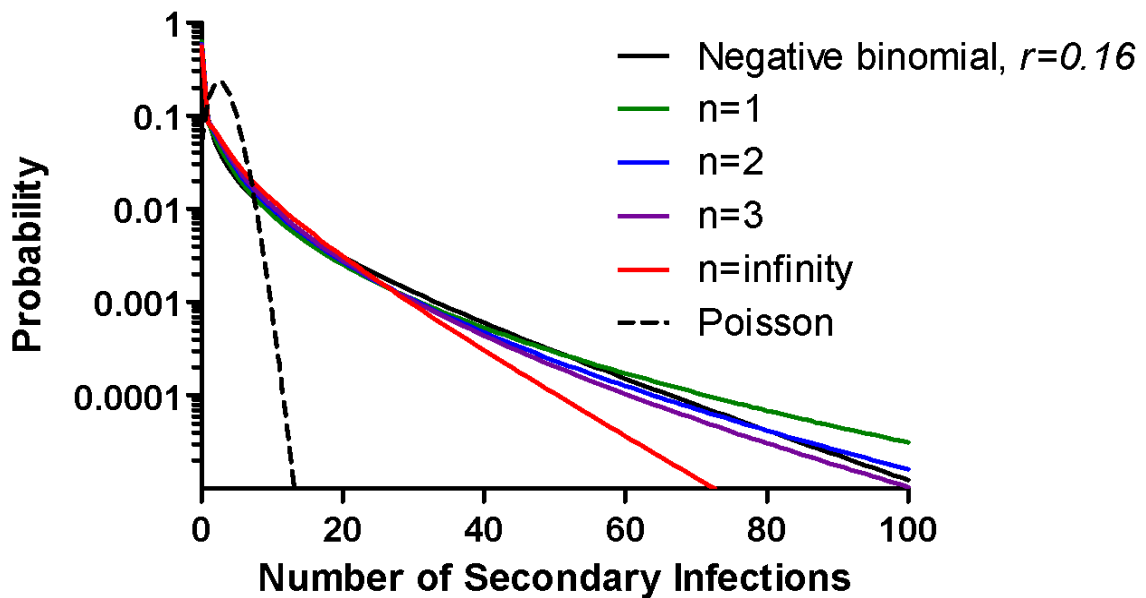

**Fig. S1. The distribution of secondary infections generated by infectious individuals.**

Black: Observed negative binomial distribution (Althouse, B. M., et al. 2020; "Stochasticity and heterogeneity in the transmission dynamics of SARS-CoV-2." <https://arxiv.org/abs/2005.13689>); Green, blue, magenta, red: The actual realized number of secondary cases generated over the lifetime of one infection in the presence of  $n$  other infectious individuals according to our scheme. All distributions have mean  $R_0 = 3.0$ . Dashed line: Poisson distribution with mean  $R_0$  as implicit in mean-field SEIR models.

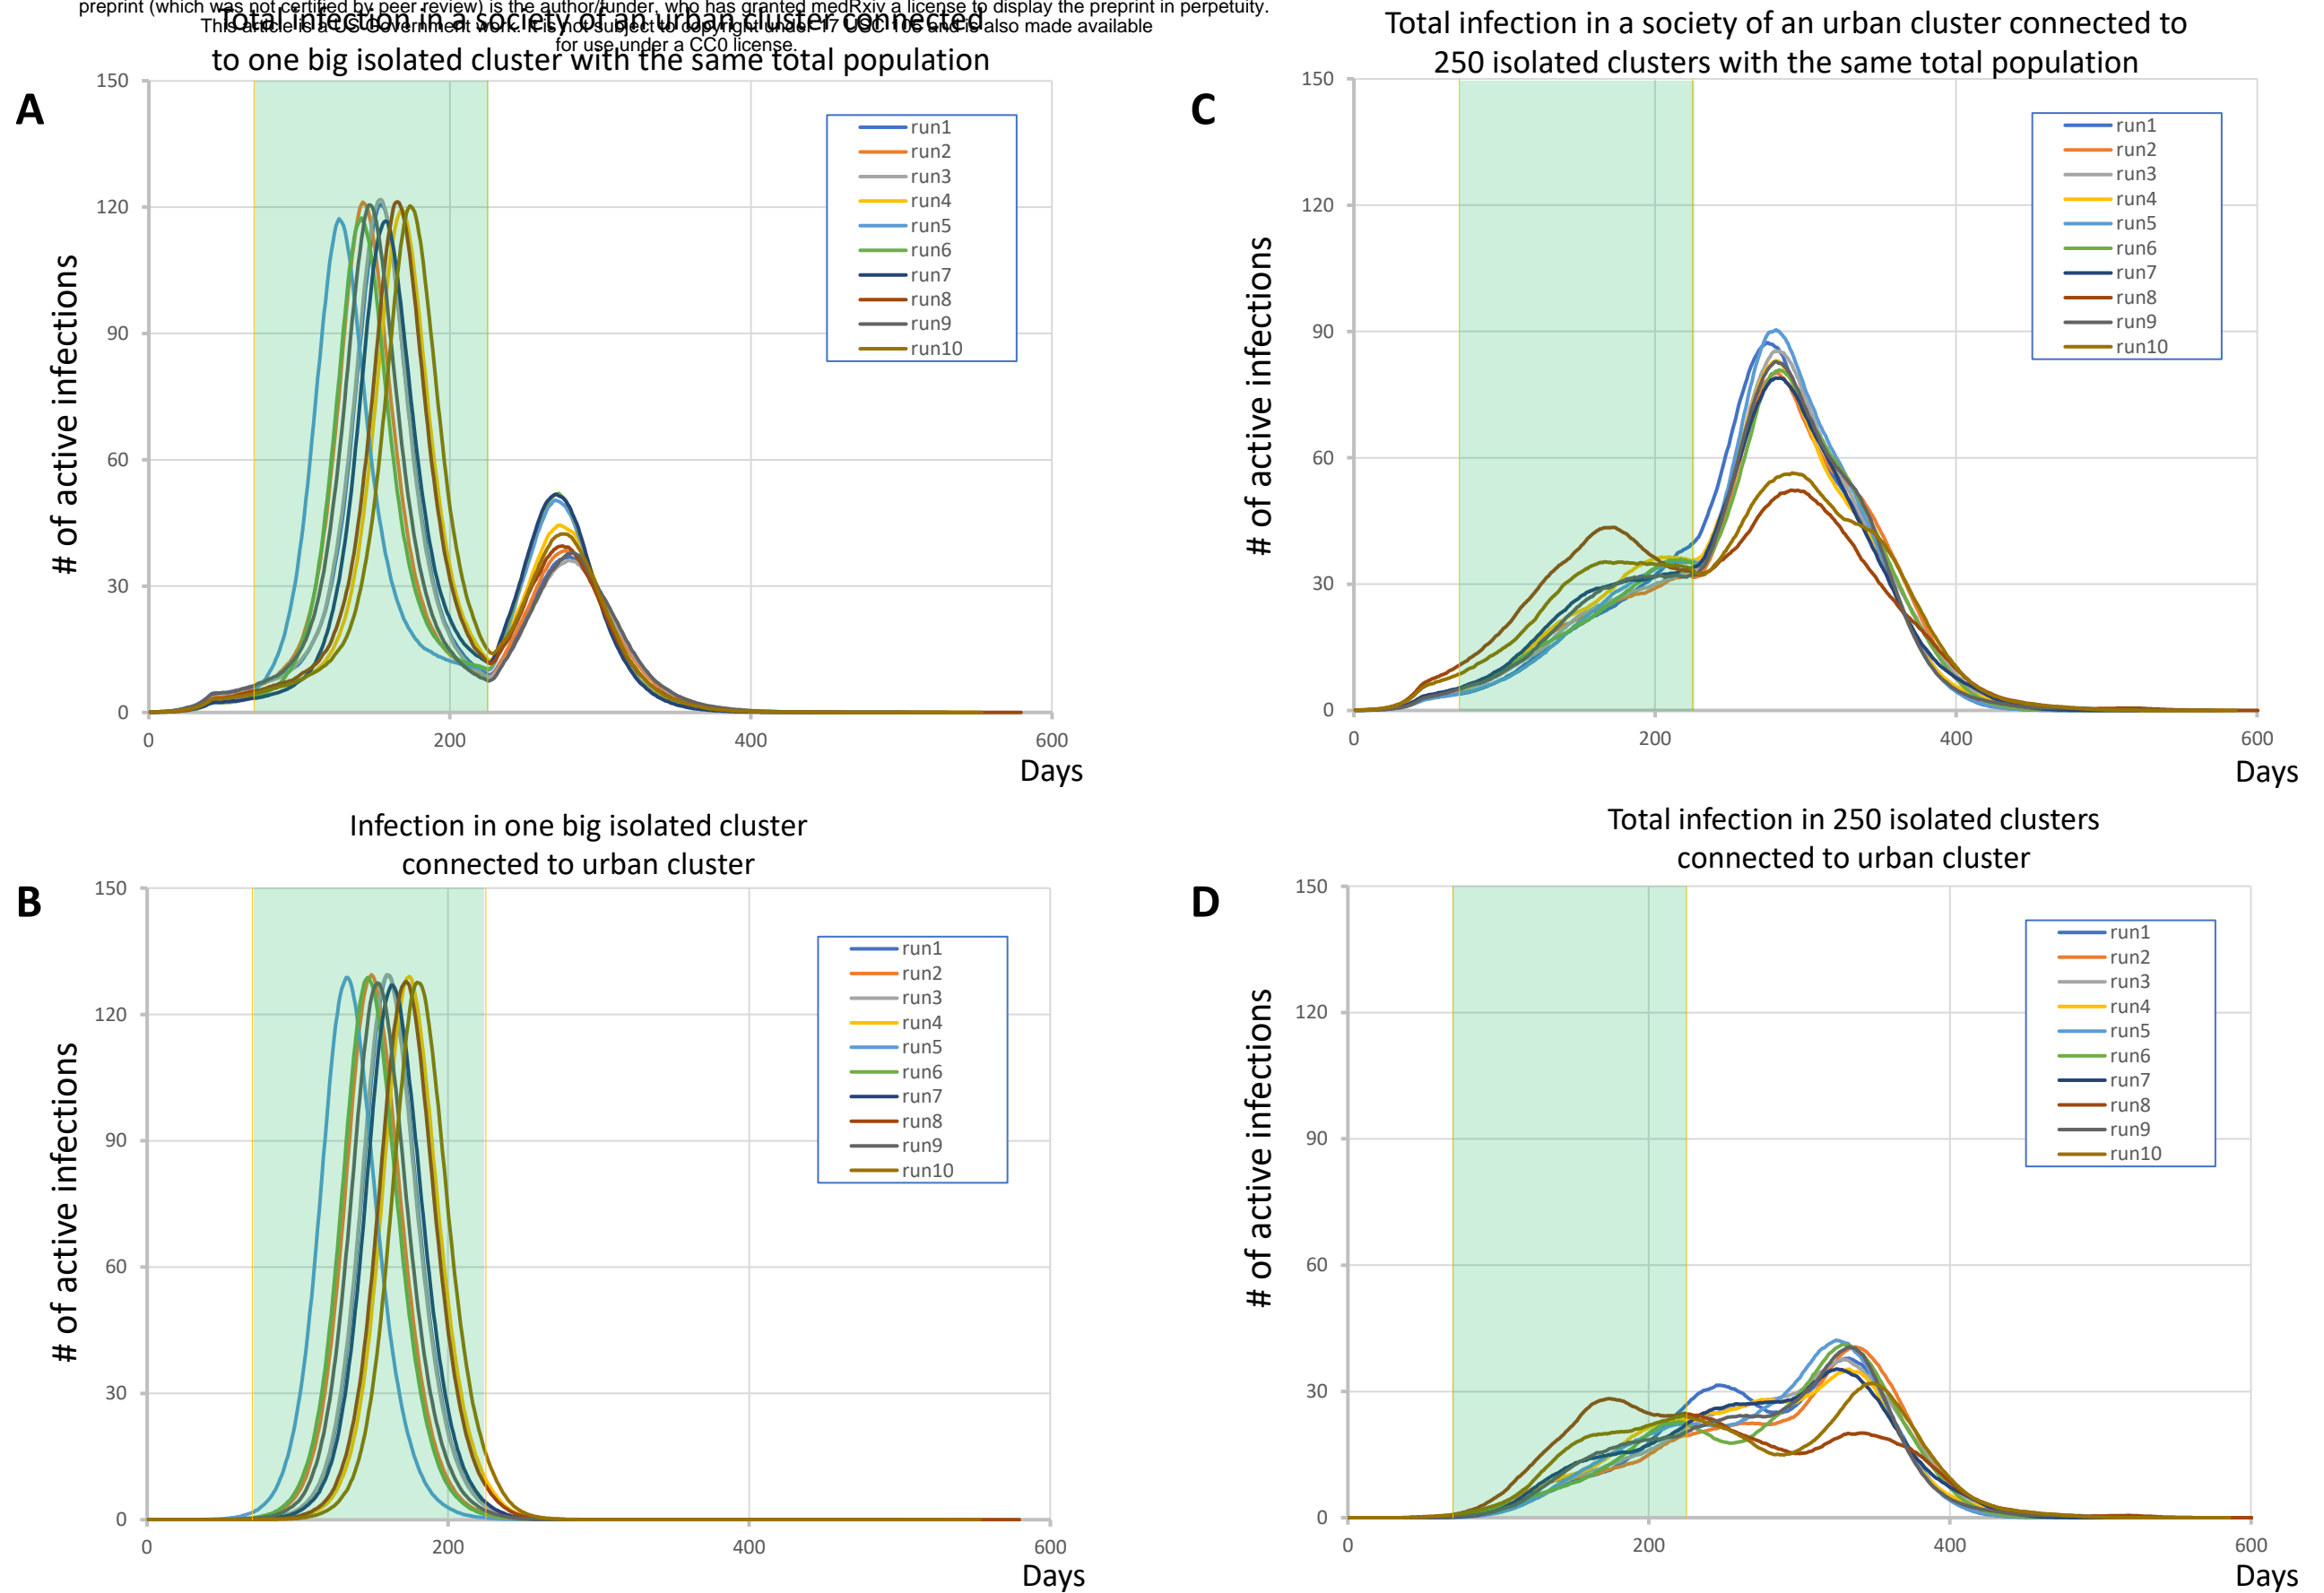

**Fig. S2. Heterogeneity of isolated clusters is important for the infection pattern.** In the most complex scenario of “moderate lockdown” (Fig. 1C in main text) we substituted 250 clusters by one big cluster with the same population of one million people keeping all other parameters the same. The big isolated cluster generated substantial and sharp infection peak (**panels A and B**) that is absent or very small in case of 250 isolated clusters (**panels C and D**). Each panel shows 10 simulation runs (overlapped multi-color curves). The lockdown period from day 40 to day 225 is shown by green shade.

### Infection in 30 individual hotspots in each urban cluster

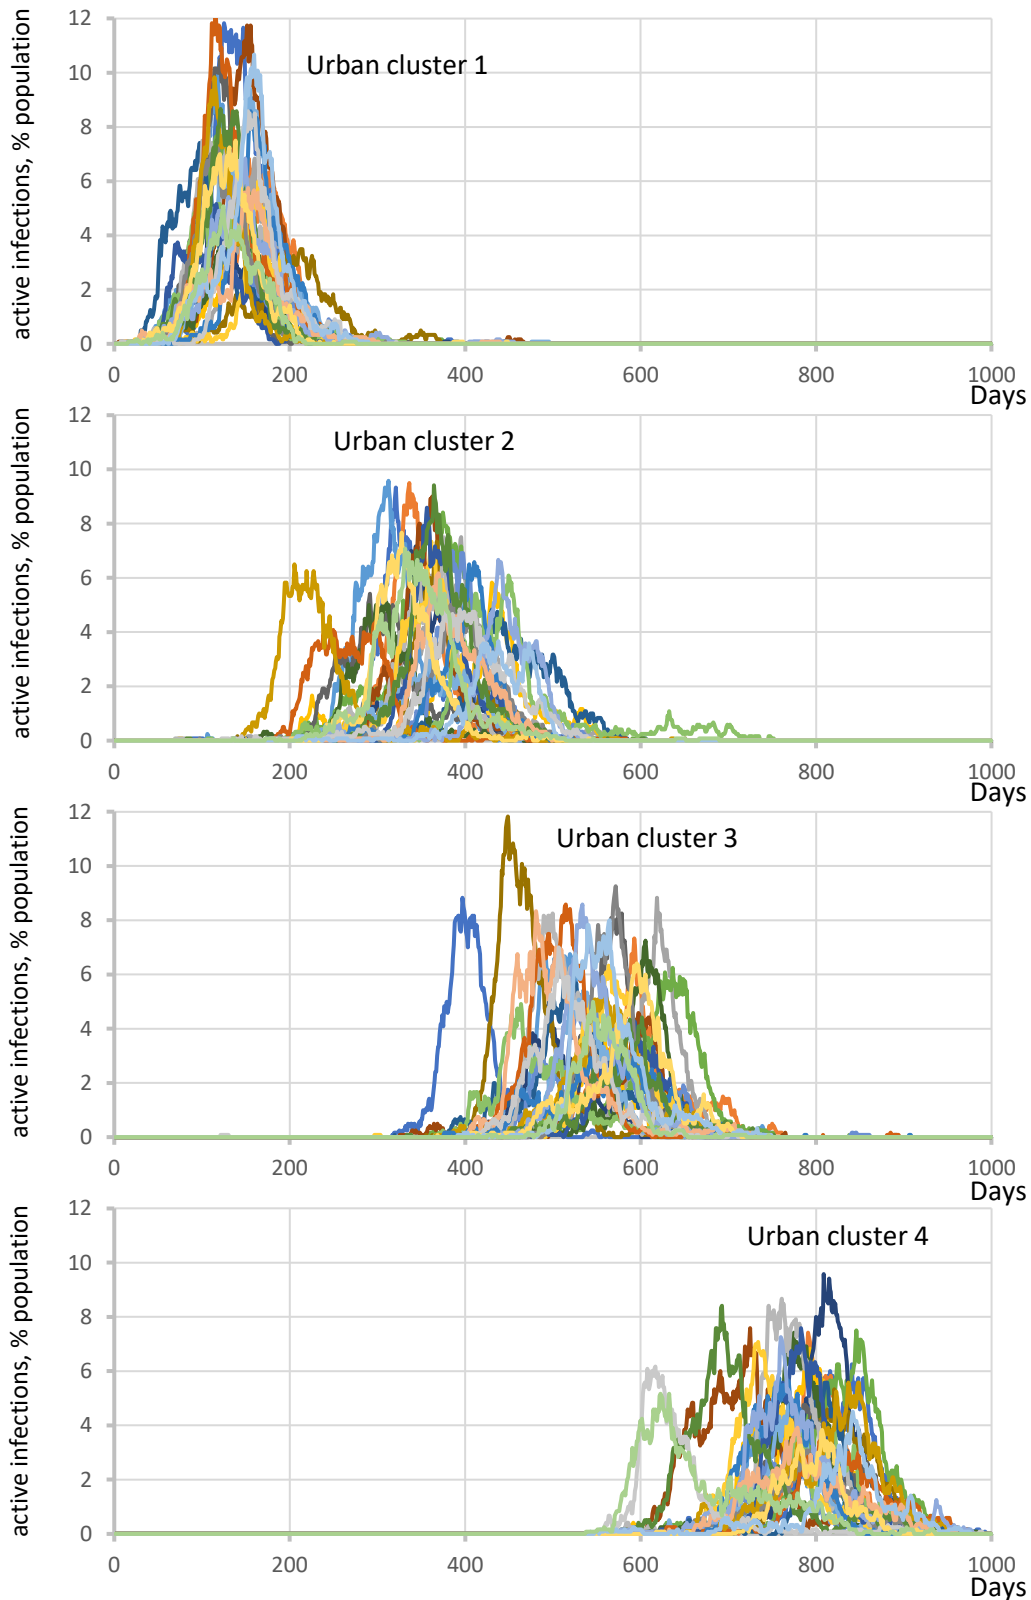

**Fig. S3.** Stochastic propagation of infection from one urban area to another via hotspots in a society of 4 connected urban areas, each in lockdown but having hotspots. Each plot from top to bottom shows infection explosions in each individual hotspot for each urban area (specified by labels). See main text for details and also Movie S2.

**Movie S1 (separate file). Highly susceptible integrated clusters (hotspots) drive SARS-Cov2 infection in an urban cluster in stochastic simulations of SHEMA model.** Infection time-dependent changes in hotspots (small squares) are coded by red shades saturating (pure red) at 5% of infection in each individual cluster. Infection in the urban area (big square) are is coded by blue shades saturating (pure blue) at 5% of infection in the area. The time is shown in the left upper corner in number of days. Large urban cluster had 1 million individuals with  $R_0 = 1.25$  while 250 hotspot clusters with 1200 +/- 500 people had the same internal  $R_0 = 3.0$ .

**Movie S2 (separate file). Hotspots drive SARS-Cov2 infection in each urban cluster and infection propagation among urban clusters in stochastic simulations of SHEMA model in a society of 4 connected urban areas.** Time-dependent changes of infection in hotspots (small squares) are coded by red shades saturating (pure red) at 3% of infection in each individual cluster. Infection in the urban area (big square) is coded by blue shades saturating (pure blue) at 3% of infection in the area. The time is shown in the left upper corner in number of days. Each urban area of 100,000 people at day 40 became closed from  $R_0 = 2.5$  to  $R_0 = 1.25$  at day 40. Each urban area has 30 hotspots with 1200 +/- 500 people that avoid closing and keep the same internal  $R_0 = 2$ .
