## Research Article

# **Social heterogeneity drives complex patterns of the COVID-19 pandemic: insights from a novel Stochastic Heterogeneous Epidemic Model (SHEM)**

Alexander V. Maltsev<sup>1</sup> and Michael D. Stern<sup>2\*</sup>

<sup>1</sup>Translational Gerontology Branch, National Institute on Aging/NIH, Baltimore, MD, USA

<sup>2</sup>Laboratory of Cardiovascular Science, National Institute on Aging/NIH, Baltimore, MD, USA

Short Title: **Social heterogeneity drives complex patterns of the COVID-19 pandemic**

*\*Corresponding Author:*

Michael D. Stern. Email: [SternMi@mail.nih.gov](mailto:SternMi@mail.nih.gov)

**Abbreviations:** COVID-19, coronavirus disease 2019; SARS-CoV-2, severe acute respiratory syndrome coronavirus 2; SEIR, susceptible-exposed-infected-removed; SHEM, Stochastic Heterogeneous Epidemic Model.

## **Abstract**

In today's absence of a vaccine and impactful treatments, the most effective way to combat the virus is to find and implement mitigation strategies. An invaluable resource in this task is numerical modeling that can reveal key factors in COVID-19 pandemic development. On the other hand, it has become evident that regional infection curves of COVID-19 exhibit complex patterns which often differ from curves predicted by forecasting models. The wide variations in attack rate observed among different social strata suggest that this may be due to social heterogeneity not accounted for by regional models. We investigated this hypothesis by developing and using a new Stochastic Heterogeneous Epidemic Model (SHEM) that focuses on vulnerable subpopulations. We found that the isolation or embedding of vulnerable sub-clusters in a major population hub generated complex stochastic infection patterns which included multiple peaks and growth periods, an extended plateau, a prolonged tail, or a delayed second wave of infection. Embedded vulnerable groups became hotspots that drove infection despite efforts of the main population to socially distance, while isolated groups suffered delayed but intense infection. Amplification of infection by these hotspots facilitated transmission from one urban area to another, causing the epidemic to hopscotch in a stochastic manner to places it would not otherwise reach, resembling a microcosm of the situation worldwide as of September 2020. Our results suggest that social heterogeneity is a key factor in the formation of complex infection propagation patterns. Thus, the mitigation of vulnerable groups is essential to control the COVID-19 pandemic worldwide. The design of our new model allows it to be applied in future studies of real-world scenarios on any scale, limited only by memory and the ability to determine the underlying topology and parameters.

## Author Summary

COVID-19 is a disease caused by the novel coronavirus SARS-CoV-2 that is both fatal and has a high transmission rate ( $R_0$ ), almost twice that of the 2017-2018 common influenza, presenting itself as a massive challenge to the world today. Existing mitigation strategies often are not efficient, and the mechanisms underlying complex infection patterns that distinguish themselves from simple curves remain unclear. Numerical modeling can identify pandemic mechanisms and inform policymakers how to improve mitigation strategies. One underexplored mechanism is social heterogeneity, specifically the contribution of vulnerable social subgroups, not accounted for by regional models. To investigate this, we developed a novel numerical model (dubbed SHEM) that examines the evolution of infection spread in a collection of diverse populations, connected by a network of links along which infection travels. We found that vulnerable subgroups that cannot implement mitigation strategies create infection hotspots which drive infection within and among urban areas, defeating mitigations. Furthermore, isolated vulnerable populations (which may hold a false sense of security in the real world) can create additional delayed infection spikes. This means effective mitigation of the COVID-19 pandemic requires close attention to vulnerable subgroups.

## Introduction

Coronaviruses represent one of the major pathogens that primarily target the human respiratory system. Previous outbreaks of coronaviruses (CoVs) that affected humans include the severe acute respiratory syndrome (SARS)-CoV and the Middle East respiratory syndrome (MERS)-CoV [1]. COVID-19 is a disease caused by the novel coronavirus SARS-CoV-2 virus that is both

fatal and has a high transmission rate ( $R_0$ ), almost twice that of the 2017-2018 common influenza [2,3]. The World Health Organization stated that this combination of high health risk and susceptibility is of great global public health concern, and efforts must be directed to prevent further infection while vaccines are still being developed [4]. As of September 2020, there are more than twenty five million confirmed COVID-19 cases and close to confirmed one million deaths. Older adults seem to be at higher risk for developing more serious complications from COVID-19 illness [5,6]. In today's absence of a vaccine and impactful treatments, the most effective way to combat the virus is to find and implement mitigation strategies. An invaluable resource in this difficult task is numerical modeling studies that can reveal key factors in pandemic development.

What models could be useful? Direct study of the available data of COVID-19 is complicated because many cases and deaths are underrepresented. However, a simple model that correctly captures large-scale behaviors, but gets some details wrong, is useful, whereas a complicated model that gets some details correct but mischaracterizes the large-scale behaviors is misleading [7]. Previously, during the H1N1 pandemic, generic (i.e. non-specific) stochastic influenza models were important to understand and quantify the full effects of the virus in simulations of important scenarios [8]. Open source stochastic models such as FluTE (2010) or GLEaM (2011) [9,10] were developed to simulate the spatial interaction and clusterization of millions of people to discover epidemic patterns.

Now, with respect to COVID-19, the FluTE model has recently been used to offer interventions to mitigate early spread of SARS-CoV-2 in Singapore [11], and GLEaM was adopted by Chinazzi et al. [12] to model the international propagation of COVID-19 to gain insight into the effect of travel restrictions on virus spread. In principle, agent-based models, like the ones mentioned above, track the fate of every individual and ought to be the most precise. However, they require detailed statistical information about the social interactions and grouping of individuals which is well characterized for seasonal influenza, but has been completely disrupted by mitigations for COVID-19 and continues to be in flux.

Despite extensive efforts to understand and predict the COVID-19 spread, the key factors that determine the multimodal rise patterns, the asymmetry of the recovery phase, and the emergence of a distinct second wave remain unclear. Therefore, instead of another data-based forecasting model, we chose to develop a scenario model to study the consequences of a set of hypothesis-driven conditions in a network of populations. One underexplored but important factor of pandemic spread is social heterogeneity which is characterized by various subpopulation clusterization, societal interaction, and disease mitigation strategies. Our hypothesis is that complex infection curves that consist of multiple infection peaks and growth periods are the consequence of asynchronous propagation of infection among groups with widely varying degrees of intra-group interaction and isolation from main hubs (a metapopulation of infections).

To approach this problem, we developed a novel Stochastic Heterogeneous Epidemic Model (dubbed SHEM) which incorporates heterogeneous aspects of society. We also take into account

over-dispersed stochasticity (super-spreading) [13], which is usually not incorporated into compartmental models but can be critical in small or virgin populations. The model design was inspired by our stochastic models of local calcium release dynamics inside heart cells, driven by explosive calcium-induced-calcium-release [14,15]. We examine several key scenarios of heterogeneity where separate communities of various clusterization and transmission capabilities are linked to a large population hub. The basic reproduction number of infection ( $R_0$ ) of the bulk of our population was assigned to  $R_0 = 2.5$  which is within the range of SARS-CoV-2 basic reproduction number based on the early phase of COVID-19 outbreak in Italy [16]. Interplay of various degrees of heterogeneity and isolation periods in our model generated various dynamic patterns of infection, including a multi-modal growth periods, an extended plateau, prolonged tail, or a delayed second wave of infection. Most importantly, we found that vulnerable social subgroups play a key role in the propagation and unpredictability of the epidemic, and can defeat efforts at social distancing.

## Results

### *Simulations of infection in isolated clusters driven by an urban cluster*

In the first set of simulations we examined the virus spread in simple hypothetical scenarios with equal numbers of individuals in urban and isolated populations (Fig 1A, insert). The large urban cluster was composed of 1 million individuals set to  $R_0=2.5$  (open level, but changing throughout the simulation). The isolated population consisted of 250 clusters, each with 4000 +/- 500 people and with the same internal  $R_0=2.5$  that remained constant throughout all simulation stages. The urban cluster was weakly connected with 0.001% transient contact into the isolated clusters (*alphainpop*) while isolated clusters had 0.1% contact into the urban cluster (*alphaoutpop*), see

Methods for the definition of transient contact. This can be visualized as a collection of small suburban neighborhoods or nursing homes that are attempting to isolate themselves from the city. We investigated 4 scenarios, specified below. In each scenario except #1, the urban cluster closed to  $R_0=1.25$  at  $t=40$  days (closed level, e.g. this was New York City under lockdown, based on 21% antibody positive tests at the peak [17]).

- 1) No mitigation, i.e. freely expanding pandemic: The large cluster of individuals stays always open.
- 2) Premature, partial reopening to  $R_0 = 1.9$  at 100 days.
- 3) Moderate lockdown period with full reopening at 225 days to  $R_0 = 2.5$ .
- 4) Long lockdown period with full reopening at 365 days to  $R_0 = 2.5$ .

A general tendency throughout all 4 scenarios was that as the lockdown period increased, the magnitude of the infection decreased but its duration increased. At the same time the interplay of the urban cluster and the isolated clusters generated a variety of specific patterns in virus spread dynamics.

In the first “no mitigation” scenario (Fig 1A) the isolated areas generated a strong second peak at the time when infection in the urban cluster had gone through its peak and was decaying. The second peak substantially extended the overall span of the pattern, nearly twice as much.

The infection rise in the “premature reopening” scenario (Fig 1B) was multi-modal. The initial rise of infection substantially slowed in the main cluster during the closed period, but a contribution from the isolated areas becomes notable closer to the partial reopening at day 100

(Fig 1D, inset). In the reopen period, the infection surged in both the isolated and urban clusters. The peak of the isolated clusters happened later than the urban cluster, creating an apparent plateau in active infection cases from day 175 to 225.

The infection dynamics in the “moderate lockdown” scenario (Fig 1C) was more complex. During the closed stage (of urban center), while infection in the urban cluster declined, the delayed infection in isolated clusters continued to rise forming an additional peak in total infections (Fig 1E, inset). Yet another peak in total infections emerged in the reopen stage that is generated mainly by the urban cluster, but echoed by the isolated subpopulations.

The “late reopening” (Fig 1D), decreased infection during the first wave in both urban and isolated clusters, but resulted in a distinct delayed second wave of infection. This second wave pattern provides a delay during which the respective second wave of deaths could be intercepted and prevented with the timely development of a vaccine or effective treatment (for example a year from the time of infection onset in Fig 1E).

We also performed a control simulation to validate that heterogeneity of isolated clusters is indeed important for the infection pattern. In the most complex scenario of “moderate lockdown” shown in Figure 1C we substitute 250 clusters by one big cluster with the same population of one million people keeping all other parameters the same. The simulations showed a different pattern in which the second big cluster always generated a peak of substantially larger amplitude (Fig S1).



### *Simulations of integrated clusters driving infection in an urban cluster*

By altering parameters in the same topology as Figure 1A, we found that the outlying clusters, if they are unable to socially distance, can become potential “hotspots” that can drive the infection in the urban population even against efforts of the latter to lock down. In this scenario the large urban cluster was composed of 1 million individuals with  $R_0 = 1.25$  throughout all simulation stages while the highly susceptible population consists of 250 clusters each with 1200 +/- 500 people and internal  $R_0 = 3.0$  that are partially embedded in the urban cluster. This  $R_0$  value is based on data from four districts in Germany when essential manufacturing sectors were open – 95%-prediction interval: 2.16 – 3.73 [18]. The potential hotspot clusters were connected with 20% out-coupling into the urban cluster ( $\alpha_{outpop} = 0.20$ , see Methods). This mechanism of transient contact implements short-term movement of the same people in and out regularly, which does not dilute the effect of the conditions in hotspots the way that random bidirectional migration would. In other words, the same people “virtually” move back and forth, but spend most of their time in the high-  $R_0$  locations where the infection regenerates. In this scenario, the small number of infections in the urban area are picked up by hotspots, amplified, and then drive a wave of infection among the urban population despite their efforts to keep their internal  $R_0$  at 1.25 by social distancing.

We performed 10 runs of these simulations which demonstrated that the integrated clusters drove infection in the urban cluster as shown in a typical example in Fig 2A, B, leading the late appearance of the epidemic in places that had seen few cases in a microcosm of the pattern. The stochastic nature of infection in individual hotspots is shown in Figure 2C; many hotspots “explode” as early as between 50 and 100 days (Movie S1). Hotspots substantially increased the

peak of infection and shifted it towards much earlier occurrence from about 400 days to 200 days (Fig 2D).

In the second “chain” topology multiple small urban areas (population 100K each) are sequentially connected and 30 potential hotspots with  $R_0=2.0$  drive infection within in each urban cluster and facilitate propagation from cluster to cluster (Fig 3, Fig S2, and Movie S2 show the stochastic dynamics of individual hotspots). In this model, the first cluster began with  $R_0 = 2.5$ , then locked down to 1.25 at day 40, while the unsuspecting clusters down the road kept  $R_0 = 1.05$  throughout, signifying low population density and efforts at social distancing, which were defeated by the hotspots picking up the small number of arriving infections and amplifying them. It is important to note, that in this scenario all four urban areas were ultimately infected (see ten consecutive simulation runs superimposed in Fig 3B), except rare cases (about 1 of 20) when the last urban cluster did not spike due to stochasticity of infection propagation. However, in the case where the hotspots were closed, infection generally didn’t reach the last urban cluster at all in the absence of amplification along the way.

### ***Reopening urban cluster after hotspots drive first wave of infection***

We extended the single urban cluster hotspot scenario to reopen when infection numbers substantially drop. Here, the main cluster was composed of 1 million individuals which starts off closed with  $R_0=1.05$  and reopens to  $R_0=2.50$  at day 360. The cluster was connected to 30 potential hotspots each with 1200 +/- 500 people with  $R_0=3.0$  which remained constant throughout all simulation stages. The urban cluster was connected with 0.1% transient contact into the isolated clusters (*alphainpop*) while isolated clusters had 1% contact into the urban

cluster (*alphaoutpop*). The results show two distinct waves of infection (Fig 4). The hotspots drove the first wave of infection, whereas the second wave was almost entirely composed of infection from the urban area, demonstrating that the hotspots acquired immunity and did not participate at all in the second wave. The ending of the first wave, dominated by the vulnerable groups, created the illusion that the epidemic was nearly over, while a large fraction of the surrounding populations was in fact still susceptible when reopening occurred.

## **Discussion**

### ***Interpretations and implications***

As of August 2020, the infection curves of the COVID-19 pandemic in various locations have been very different from standard smooth bell curves. Here we tested the hypothesis that multiple, asynchronous waves and plateaus are in part due to stochasticity and heterogeneity, as well as due to changing efforts at mitigation. Geographic heterogeneity is included in forecasting models [12,19,20] which use extensive, public databases of population characteristics and travel patterns, but these do not fully account for the stratification of social behaviors that controls the spread of the virus. Therefore, instead of building another data-based forecasting and estimation model, we developed a numerical scenario model that we used to explore mechanisms of infection dynamics with regards to social stratification. The model was built as a network of “populations” which represent social and behavioral strata of geographic populations. Our model can be considered a metapopulation of SARS-CoV2, when a single species is spread among different environments that determine its local survival or extinction.

We examined several scenarios which included one or more large urban populations connected to vulnerable subgroups that are unable/unwilling to socially distance and thus represent potential COVID-19 hotspots. Depending on the degree of interaction, these subgroups were either driven by infection from the main population, or acted as major drivers of the epidemic. Isolated subpopulations were infection-driven (*e.g.* nursing homes, prisons, remote suburbs, clustered religious groups) and had a substantially delayed contribution to total infection cases, ultimately forming an infection curve which could include multi-modal growth periods, an extended plateau, a prolonged tail, or a delayed second wave of infection (Fig 1). These communities, due to their isolated nature, had low herd immunity that put them at risk for explosive scenarios when basic mitigation strategies were not implemented. Alternatively, partially integrated subpopulations were driving infection (*e.g.* employees of factories, warehouses, meat packing plants, church groups, campuses, shelters, and other essential workers) in its connected urban population by picking up infection and amplifying it by (Fig 2, movie S1). We found that these “hotspots” ignite infection even in a locked down population, ultimately propagating and igniting other isolated populations (Fig 3, movie S2). The locked down population however does not acquire herd immunity, as opposed to the hotspots, and thus when lockdown is lifted, a second wave is generated by the main cluster (Fig 4).

There are several implications that arise from our results. We can expect social heterogeneity to form delayed local asynchronous epidemics, creating a variety of infection profiles in various regions over time, prolonging the pandemic time span, and spreading to new areas unpredictably due to the stochasticity of infection in small subgroups. Effective mitigation of the epidemic in the main population requires close attention to vulnerable subgroups in order to prevent the

formation of COVID-19 infection hotspots. Otherwise vulnerable subgroups that cannot implement mitigation strategies spread infection to the socially distanced populations, defeating their efforts at mitigation. Despite hotspots possibly acquiring immunity, there still exists a threat of a second wave of infection in the socially distanced main population. Thus, an effective treatment or vaccination needs to be developed prior to full reopening.

### *Comparison with other studies*

While our study is focused on vulnerable subpopulations in pandemic development, there are other important factors regarding social heterogeneity identified by previous studies. The study by Dolbeault et al. [21], using their multi-group SEIR model, underlined the importance of mitigation measures on single individuals with a high level of social interactions. Indeed, their study showed that even a small group of individuals with high transmission rate can trigger an outbreak even if the  $R_0$  of the majority is below 1. Althouse et al. [13] identified and explored in depth another important factor, explosive super-spreading events originating from long-term care facilities, prisons, meat-packing plants, fish factories, cruise ships, family gatherings, parties and night clubs. This study further demonstrated the urgent need for targeted interventions as routes of effective virus transmission. Taking into account the importance of these super-spreading events and individuals, they were included in the design of our model (see Methods, Super-spreading) to generate more realistic outcomes of scenarios.

With regard to agent-based models, Chinazzi et al. [12] used GLEaM to demonstrate that travel restrictions introduced in Wuhan in January 2020 only delayed epidemic progression by 3 to 5 days within China, and international travel restrictions only helped slow infectious spread until

mid-February. Our simulations of COVID-19 spread also show that ultimately, when enough time goes by, isolation does not prevent infection of vulnerable subpopulations (Fig 1). Chinazzi et. al. suggests that early detection, hand washing, self-isolation, and household quarantine are more effective than travel restrictions at mitigating this COVID-19 pandemic. Our recommendations are in accord, and we advocate for communities to take extra care of vulnerable subpopulations internally, as so to prevent a possible hotspot formation that may evolve into a regional epidemic.

### ***Model features, limitations, and future studies***

An epidemic can be likened to a forest fire, which spreads by diffusion along a front, but can also jump by embers that may or may not start a new blaze. Such spread to virgin areas, with a virus as with a fire, is intrinsically stochastic and such stochasticity, which is not explicitly included in mean-field models, may contribute to the remarkable patchiness of the COVID-19 epidemic. This has caused the epidemic to appear entirely different to observers in different locations, leading to politicization of the response, which is, itself, a form of social heterogeneity. For rare spread to small, isolated subgroups (embers) this stochasticity is crucial. Patchiness is aggravated by the over-dispersion (super-spreading) of secondary cases of COVID-19, where the majority of infected individuals do not spread the virus, but some can cause up to a hundred secondary infections [13]. Our model is explicitly stochastic, with a mechanism to account for over-dispersion, by keeping a partial history of individual infections. Furthermore, the design of our new model allows it to be applied in future studies of real-world scenarios on any scale, limited only by memory and the ability to determine the underlying topology and parameters.

However in our model, we make no attempt to distinguish between symptomatic and asymptomatic cases, despite recent findings by Chao et al. [22] in their agent-based model (dubbed Corvid) that demonstrated that most infections actually originate from pre-symptomatic people. Since the relative infectivity of symptomatic and non-symptomatic is uncertain, there is no direct way to accurately determine the number of asymptomatic infections at present. Such a distinction (included in a number of other models) could easily be added by subdividing the 5 compartments, at the risk of added complexity and more parameters needed in a scenario.

We did not take into account recent suggestions that infectivity is concentrated in a short time window just before and after symptom onset. Instead, we used the standard SEIRD assumption that infections are generated throughout the period of infection, using a mean clinical duration of 7 days. The model does not consider the physical mechanisms of transmission of COVID-19, or the possibility that many recovered patients do not quickly re-enter their normal social circles, delaying herd immunity. An additional compartment, with a pipeline mechanism, could also be added to account for this.

## **Methods**

### ***Model purpose***

In view of the constantly changing behavioral environment for COVID-19 in the United States and worldwide, data-based predictive modeling of the future of the epidemic is difficult. Our model is specifically intended to examine the effect of heterogeneity, including not only geographic but also social heterogeneity, i.e. the existence of groups within one geographic

location that have different social interaction patterns and may be partially isolated from neighboring groups, *e.g.* nursing homes, prisons, campuses. Alternatively, subgroups can be partially embedded in the main population, *e.g.* meat processing plants or warehouse employees who are unable to socially distance at work, but spend part of their day in the main community where they can acquire and amplify infection. The model is fully stochastic and, unlike most compartmental models, incorporates the effect of over dispersion of secondary infections (super spreading).

### ***Structure of the Model***

The general model consists of a number of subpopulations (“villages”) whose number is limited only by memory. The simulation is based on a generalization of the SEIRD representation. The state of each village is represented by the numbers of individuals in each of 5 states: *Susceptible*, *Exposed* (destined to become infected), *Infected*, *Recovered* (immune) and *Dead* (however, see below under Super-spreading for additional state-dependence). Each village is, by definition, homogeneous and mixed. Villages could represent actual geographic units, but could also be groups or sub-regions that have different social interactions or behavior. The mean duration of infection (infectious period) was taken to be 7 days and the incubation period 5.5 days.

Each village  $J$  is characterized by its population, the expected mortality of virus infections, and its local value  $R_{INN}(J)$  of the basic reproduction number  $R_0$ .  $R_0$  is defined as the mean expected number of secondary infections spawned by one infected individual over the duration of their illness, *if the population were totally susceptible*. It is a property of both the virus and the



behavior of individuals in the population, but is distinct from  $R(t)$ , the realized, time dependent, reproduction number that depends also on the fraction of susceptible individuals remaining during the epidemic.

Villages are connected by a user-specified network of unidirectional links along which infection or individuals can travel at user-specified rates, including links from each village to itself to represent internal infection/recovery processes. Infection can spread by two processes: transient contact between groups (*alpha* process) *e.g.* nursing home staff coming from the city, or actual migration of individuals from one village to another (*beta* process). Each non-self link is characterized by 4 user-supplied parameters: *alphain* and *alphaout* describe the degree of transient contact (see below) along or against the direction of the link respectively; *betain* and *betaout* are rates of migration of individuals ( $\text{time}^{-1}$ ).

### ***Transient Contact (alpha) Process***

Infection transmitted by transient contact is modeled as though members of one village spend some (small) fraction *alpha(in/out)* of their time (*i.e.* of their inter-personal contacts) “visiting” the opposite village at the other end of the link, adjusted for any mitigations (an example would be staff working at a nursing home, or meat-packing plant employees, treated as a separate, high-risk population but living in the surrounding county). The spread of infection in each direction of the link has two components: (1) exposure of susceptibles by visiting infectious individuals and (2) exposure of visiting susceptibles in the visited village, who then carry the infection back to their village. This formulation allows for the possibility that transmission is asymmetric. The

generation of exposure by these “visitors” at home and abroad is scaled so that each infected individual, generates (in an otherwise susceptible population) his destined number of secondary cases (see below under super-spreading).

This arrangement allows for the possibility that “visitors” from different villages could cross-infect while visiting a common hub (picture UPS and FEDEX drivers) even if there is no direct link between them. To represent this process, “virtual links” are generated between pairs of physical links that meet in a hub (in graph-theory terms these are links of the adjoint graph of the network). Infection by this indirect process is second order in the alpha’s so it makes very little contribution in the case of highly isolated sub-populations (*e.g.* nursing homes, prisons) but could be important for embedded sub-populations with high contact with the hub.

### ***Simulation Method***

The entire collection of populations is simulated as a single, continuous-time Markov chain (birth-death process). There are 14 types of possible events associated with each link:

- 1) Infection from source to target by transient contact
- 2) Infection from target to source by transient contact
- 3) Infected individual moves from source to target
- 4) Exposed individual moves from source to target
- 5) Susceptible individual moves from source to target
- 6) Infected individual moves from target to source

- 7) Exposed individual moves from target to source
- 8) Susceptible individual moves from target to source
- 9) Susceptible gets exposed inside village (self-link only)
- 10) Exposed converts to infected inside village (self-link only)
- 11) Infected recovers inside village (self-link only)
- 12) Infected dies inside village (self-link only)
- 13) Recovered moves from source to target
- 14) Recovered moves from target to source

At each step, rates of these 14 possible events (computed as in classic SEIRD differential equations, except as below under Super-spreading) are summed over all links in the network to give a total transition rate  $R_{tot}$ . A uniformly distributed random number  $rn$  is generated and  $-\log(rn)/R_{tot}$  is taken to be the waiting time until the next event, considered as a Poisson point process. Time  $t$  is advanced by that amount and then a particular transition is selected by a second random number  $rn_2$  by partitioning  $R_{tot}$  into segments proportional to their relative rates and finding which segment contains  $rn_2 * R_{tot}$ . The action associated with the prescribed event (*e.g.* increment/decrement numbers in states SEIRD of the villages connected by the link) is taken, and then the above is repeated for the next step. This is continued until  $t$  reaches  $t_{max}$  specified in the input parameter file or  $tswitch$ , the time set for a discrete change in parameters. Output is produced whenever  $t$  crosses  $tout$ , which is then incremented to  $t$  plus a user-specified interval (usually one day). This time-binning is only for output and plays no role in the continuous-time evolution of the epidemic.

### ***Super-spreading***

It is known that the distribution of secondary COVID-19 infections generated by a single, infected individual is over-dispersed (*i.e.* has a long tail compared to the Poisson distribution of infections expected if transmission were random). Although the average  $R_0$  is estimated to be 2.5-4 in the absence of social distancing mitigations, contact tracing has shown that single individuals have infected up to a hundred others. This is known as super-spreading events, and can occur by several possible mechanisms, involving either a predilection of an individual (*e.g.* a celebrity who travels widely and contacts many other people) or a situation in which individuals were placed in unusually close contact (*e.g.* a church choir in an indoor location). On the other hand, the majority of infected individuals do not appear to spread the infection to anyone. It has been shown [13] that this over-dispersed distribution can be approximated by a negative binomial distribution, with mean  $R_0$  (by definition) and dispersion parameter  $r \ll 1$ , for example 3 and 0.16. By iterating this distribution for several generations of viral spread, it is found that the eventual distribution of epidemic size is predicted to be quite different than found for a hypothetical stochastic transmission by Poisson-distributed secondary infections with the same  $R_0$ . A recent model of contact tracing assumed, based on data from the Netherlands, that the distribution of number of personal contacts outside the family is distributed as a negative binomial and used this to generate random changes to infection levels at 1-day intervals [23].

Unfortunately, viral generations do not remain synchronous in time, so it is not straightforward to incorporate super-spreading in a time-dependent epidemic evolution model except by

following the interactions and infections of each individual in the population, as done for example in the FLuTE simulation for influenza [8]. This is very compute-intensive, but a more significant objection from our point of view is that it depends on knowing (statistically) the social interaction groups and travel behavior of the population at a fine-grained scale, and these have been severely disrupted by mitigation efforts during the current pandemic. Rather than speculate on these variables, we have developed a modified Markov scheme that tries to reproduce the observed distribution of secondary infections by replacing  $R_0$  in the event-rate calculations by an infectivity that is itself stochastic.

Supposing that an individual produces, *a posteriori*,  $K$  secondary infections over the lifetime  $t_{dur}$  of his infection, the required rate is  $K/t_{dur}$ . However,  $t_{dur}$  is itself stochastic: in our model, as in simple SIR models, recovery is treated as a Poisson point process with a rate  $1/trec$  per infected individual where  $trec$  is the observed mean duration of infections (it is not presently known whether that is true of asymptomatic infections). When there are multiple infected individuals present, if recovery events in the population are random with a rate  $k_i/trec$ , where  $k_i$  is the number of infected individuals in the village, a super-spreader is likely to be “recovered” before (or after) doing his “job”. To avoid this, we have adopted the following scheme:

- In each village  $j$ , at each event, an infectivity  $inf(j)$  is maintained that takes the place of  $k_i * R_0$  in the SEIRD rate equations.
- Whenever a new infection is created (by conversion of an exposed individual), a random number  $K$  is drawn from a negative binomial distribution of mean  $R_0$  and dispersion  $r_{eff}$ ,

the latter to be determined.  $Inf$  is incremented by  $K$  and the individual infectivity  $K$  is placed on the top of a linked list.

- Whenever a random recovery event is generated at the above-mentioned rate, the oldest individual infectivity is removed from the bottom of the list and subtracted from  $inf$ .

The overall rate of infection events, based on  $inf$ , will be a superimposition of the rates of the individual infection events generated by each infected individual. The mean number of secondary infections actually realized by one infected individual over the life of his infection will be  $K*t_{dur}/trec$ . Since infections recover in the order in which they were created, if there are  $n$  infections active,  $t_{dur}$  will be the  $n^{\text{th}}$  waiting time of the Poisson point process of rate  $n/trec$  (where  $n=k_i(j)$ ), whose probability distribution is proportional to  $poisson(n-1, n/trec)$ . The individual infections generated by individual  $K$  are a Poisson point process, so the probability that the individual actually generates  $j$  secondary infections is  $poisson(j, K*t_{dur}/trec)$ . Integrating this over the distribution of  $t_{dur}$ , multiplying by the probability mass distribution of the negative binomial distribution and summing over  $K$  we find:

$$p(j, n) = \frac{n^n \Gamma(n+j) r^r \sum_{k=0}^{\infty} \frac{r_0^k k^j (n+k)^{-n-j} (r+r_0)^{-r-k} \Gamma(r+k)}{\Gamma(k+1)}}{j \Gamma(j) \Gamma(n) \Gamma(r)}$$

as the distribution of the actual, realized number of secondary infections. This is a long-tailed probability distribution that can be fit, by an appropriate choice of  $r_{eff}$ , to approximate the empirical negative binomial distribution with  $r=0.16$  over the relevant range. With more than a few active infections present, the distribution converges to:

$$p(j, \infty) = \frac{n^n \Gamma(n+j) r^r \sum_{k=0}^{\infty} \frac{r_0^k k^j (n+k)^{-n-j} (r+r_0)^{-r-k} \Gamma(r+k)}{\Gamma(k+1)}}{j \Gamma(j) \Gamma(n) \Gamma(r)}$$

We choose  $r_{eff}$  to give the best least-squares fit on a linear scale of the case  $n=1$ , which is the most important stochastic case since it governs the chance that a single infected individual can start an outbreak, giving the chance that an infected individual causes no secondary infections,  $p(0,1)=0.62$  similar to the empirical distribution. These distributions are all normalized and have mean  $R_0$  and differ dramatically from the Poisson distribution (Fig S3, dashed line) assumed in the classic SEIR model. Larger values of  $n$  are decreasingly important because the aggregate distribution of the actual infection rate controlled by the sum *inf* behaves similarly to *negbinomial* ( $R_0, n*r$ ) which converges to Poisson, so stochastic effects become less important once there are many active cases.

### ***Super-spreaders vs super-spreading events***

Super-spreading can be a property of the individual or of the circumstances. What happens when an individual infected patient migrates to a new village? Does he keep his identity or does he assume the infectiousness typical of the local  $R_0$  of his new environment? In the model we can make the choice, determined by a logical variable SPREADR (default TRUE. controlled in the demos by the input parameter *spreads*). If SPREADR is true, a migrant keeps his prior  $K$  value which simply migrates from the top (newest) link to be added to the top of the infection list in the new village, thereby preserving his infectious lifetime in his new home. If SPREADR is false then the  $K$  value of migrants is re-randomized using the local  $R_0$  and  $r_{eff}$  and the infectivity of

transient visitors in the alpha process is re-scaled to the local value of  $R_0$ . In the current version of the program, SPREADR is a single variable governing all events, but it could easily be made specific to individual links to distinguish groups that are vulnerable due to high density in their home village (e.g. factory or warehouse) versus groups that are intrinsically super-spreaders due to their individual behavior.

### *Software Considerations*

The model software is written in Fortran 77/95. The main simulation engine, described above, is in the form of a single Fortran module SIMULATOR. It is intended to be driven by a front-end program that sets up the distribution of the populations, topology of the network, and parameter changes at discrete time points, and connects to SIMULATOR by calling subroutine EPISIM (28 variables). Ideally, the front end should use some kind of scripting language based on network concepts. For purpose of these demonstrations, we hand-coded a front end – epichainF, describing a chain of urban clusters (or a single cluster) connected by bidirectional travel, each linked to a large set of small subpopulations whose characteristics differ from the urban cluster. The single Markov-chain structure of the model is intrinsically serial, and is implemented in a single processor thread. For configuration with a large number of links sharing a common hub, the large number virtual links can make this slow. The main inner loop will be parallelized in future versions.



## Acknowledgments

The work was supported by the Intramural Research Program of the National Institute on Aging, National Institute of Health. This study utilized the high-performance computational capabilities of the Biowulf Linux cluster at the National Institutes of Health, Bethesda, MD.

(<http://biowulf.nih.gov>).

## References

1. Rothan HA, Byrareddy SN (2020) The epidemiology and pathogenesis of coronavirus disease (COVID-19) outbreak. *J Autoimmun* 109: 102433.
2. Xiaofang F, Yuqing Z, Jie W, Xiaoxiao L, Cheng D, et al. (2019) A Severe Seasonal Influenza Epidemic During 2017–2018 in China After the 2009 Pandemic Influenza: A Modeling Study. *Infectious Microbes & Diseases* 1: 20-26.
3. Liu Y, Gayle AA, Wilder-Smith A, Rocklöv J (2020) The reproductive number of COVID-19 is higher compared to SARS coronavirus. *J Travel Med* 27.
4. Organization WH (2020) Coronavirus disease 2019 (COVID-19) Situation Report – 72. <https://apps.who.int/iris/bitstream/handle/10665/331685/nCoVsitrep01Apr2020-eng.pdf>.
5. Liu K, Chen Y, Lin R, Han K (2020) Clinical features of COVID-19 in elderly patients: A comparison with young and middle-aged patients. *J Infect* 80: e14-e18.
6. Li P, Chen L, Liu Z, Pan J, Zhou D, et al. (2020) Clinical features and short-term outcomes of elderly patients with COVID-19. *Int J Infect Dis* 97: 245-250.
7. Siegenfeld AF, Taleb NN, Bar-Yam Y (2020) Opinion: What models can and cannot tell us about COVID-19. *Proceedings of the National Academy of Sciences*: 202011542.
8. Chao DL, Halloran ME, Obenchain VJ, Longini IM, Jr. (2010) FluTE, a publicly available stochastic influenza epidemic simulation model. *PLoS Comput Biol* 6: e1000656.
9. Van den Broeck W, Giannini C, Goncalves B, Quaggiotto M, Colizza V, et al. (2011) The GLEaMviz computational tool, a publicly available software to explore realistic epidemic spreading scenarios at the global scale. *BMC Infect Dis* 11: 37.
10. Balcan D, Goncalves B, Hu H, Ramasco JJ, Colizza V, et al. (2010) Modeling the spatial spread of infectious diseases: the GLocal Epidemic and Mobility computational model. *J Comput Sci* 1: 132-145.
11. Koo JR, Cook AR, Park M, Sun Y, Sun H, et al. (2020) Interventions to mitigate early spread of SARS-CoV-2 in Singapore: a modelling study. *Lancet Infect Dis* 20: 678-688.
12. Chinazzi M, Davis JT, Ajelli M, Giannini C, Litvinova M, et al. (2020) The effect of travel restrictions on the spread of the 2019 novel coronavirus (COVID-19) outbreak. *Science* 368: 395-400.
13. Althouse BM, Wenger EA, Miller JC, Scarpino SV, Allard A, et al. (2020) Stochasticity and heterogeneity in the transmission dynamics of SARS-CoV-2. <https://arxiv.org/abs/200513689>.
14. Stern MD, Maltseva LA, Juhaszova M, Sollott SJ, Lakatta EG, et al. (2014) Hierarchical clustering of ryanodine receptors enables emergence of a calcium clock in sinoatrial node cells. *J Gen Physiol* 143: 577-604.

15. Maltsev AV, Maltsev VA, Stern MD (2017) Clusters of calcium release channels harness the Ising phase transition to confine their elementary intracellular signals. *Proc Natl Acad Sci U S A* 114: 7525-7530.
16. Rahman B, Sadraddin E, Porreca A (2020) The basic reproduction number of SARS-CoV-2 in Wuhan is about to die out, how about the rest of the World? *Rev Med Virol*: e2111.
17. Schultz C (2020) More than one in five people who were tested for virus antibodies in N.Y.C. had them. *The New York Times*:  
<https://www.nytimes.com/2020/04/23/nyregion/coronavirus-new-york-update.html>.
18. The-Robert-Koch-Institute (2020) COVID-19 Situation Report 21/06/2020.  
[https://www.rki.de/DE/Content/InfAZ/N/Neuartiges\\_Coronavirus/Situationsberichte/2020-06-21-en.pdf](https://www.rki.de/DE/Content/InfAZ/N/Neuartiges_Coronavirus/Situationsberichte/2020-06-21-en.pdf).
19. Friston KJ, Parr T, Zeidman P, Razi A, Flandin G, et al. (2020) Second waves, social distancing, and the spread of COVID-19 across America. <https://arxiv.org/abs/200413017>.
20. Pei S, Kandula S, Shaman J (2020) Differential Effects of Intervention Timing on COVID-19 Spread in the United States. <https://www.ncbi.nlm.nih.gov/pubmed/32511526>.
21. Dolbeault J, TURINICI G (2020) Social heterogeneity and the COVID-19 lockdown in a multi-group SEIR model. <https://www.medrxiv.org/content/101101/2020051520103010v1>.
22. Chao DL, Oron AP, Srikrishna D, Famulare M (2020) MODELING LAYERED NON-PHARMACEUTICAL INTERVENTIONS AGAINST SARS-COV-2 IN THE UNITED STATES WITH CORVID.  
<https://www.medrxiv.org/content/101101/2020040820058487v1.full.pdf>.
23. Kretzschmar ME, Rozhnova G, Bootsma MCJ, van Boven M, van de Wijkert J, et al. (2020) Impact of delays on effectiveness of contact tracing strategies for COVID-19: a modelling study. *Lancet Public Health* 5: e452-e459.

## Figure legends

### **Fig 1: Complex dynamic patterns of SARS-CoV2 infection in simulations in a heterogeneous society when infection in isolated clusters are ignited by an urban cluster implementing various lockdown strategies.**

**A**, isolated clusters generate a second delayed peak when no intervention is implemented. Inset schematically illustrates the society structure in this scenario. Contributions are shown by different colors. **B**, an apparent plateau after early reopening and complex rise pattern during close period (inset). Green shade shows the lockdown periods. **C**, A multimodal rise (inset) with additional peak generated by rural cluster after full reopening at day 225. **D**, A delayed second wave emerged after full reopening at day 365. **E**, The dynamics of total number of deaths in each scenario (A-D).

### **Fig 2: Highly susceptible integrated clusters (hotspots) drive SARS-CoV2 infection in an urban cluster.**

**A and B**, Initial rise of infection in hotspot clusters is followed by the infection in urban cluster with a delay of about 30 days. Y-axis represents active infections in % population reflecting for hotspots (red line) the ratio of all active cases in all hotspots to entire population of all 250 hotspots. Inset shows schematically the society structure in this scenario. **C**, Infection in individual hotspots (multiple colors) substantially fluctuates in terms of time of ignition and magnitude from the mean (red bold curve). See also Movie S1. **C**, Explosive infection in hotspots within locked urban cluster substantially increased the peak of infection in the entire society and shifted it towards much earlier occurrence from about 400 days to 200 days. Shown are 10 simulation runs for each scenario.

### **Fig 3: Complex infection propagation patterns in multiple urban areas containing hotspots.**

**A**, Schematic illustration of the heterogeneous society used in simulations. **B**, Total infection count oscillates as infection propagates. While individual oscillations exhibit substantial variations in timing and amplitude, the patterns remain the same (i.e. 4 oscillations, reflecting infection surge in each urban cluster). **C**, The infection in hotspots is delayed before the lockdown at day 40, but then is always in the

lead (red curves), driving infection in each urban cluster (blue curves) and facilitating infection propagation among clusters (Movie S2).

**Fig 4: Second wave in the hotspot scenario.** Urban cluster generates a second wave of infection when it reopens from  $R_0=1.05$  to  $R_0=2.50$  on day 360 (green line), whereas hotspots with  $R_0=3.0$  (red line) have acquired immunity in the first wave and do not participate in the second wave.

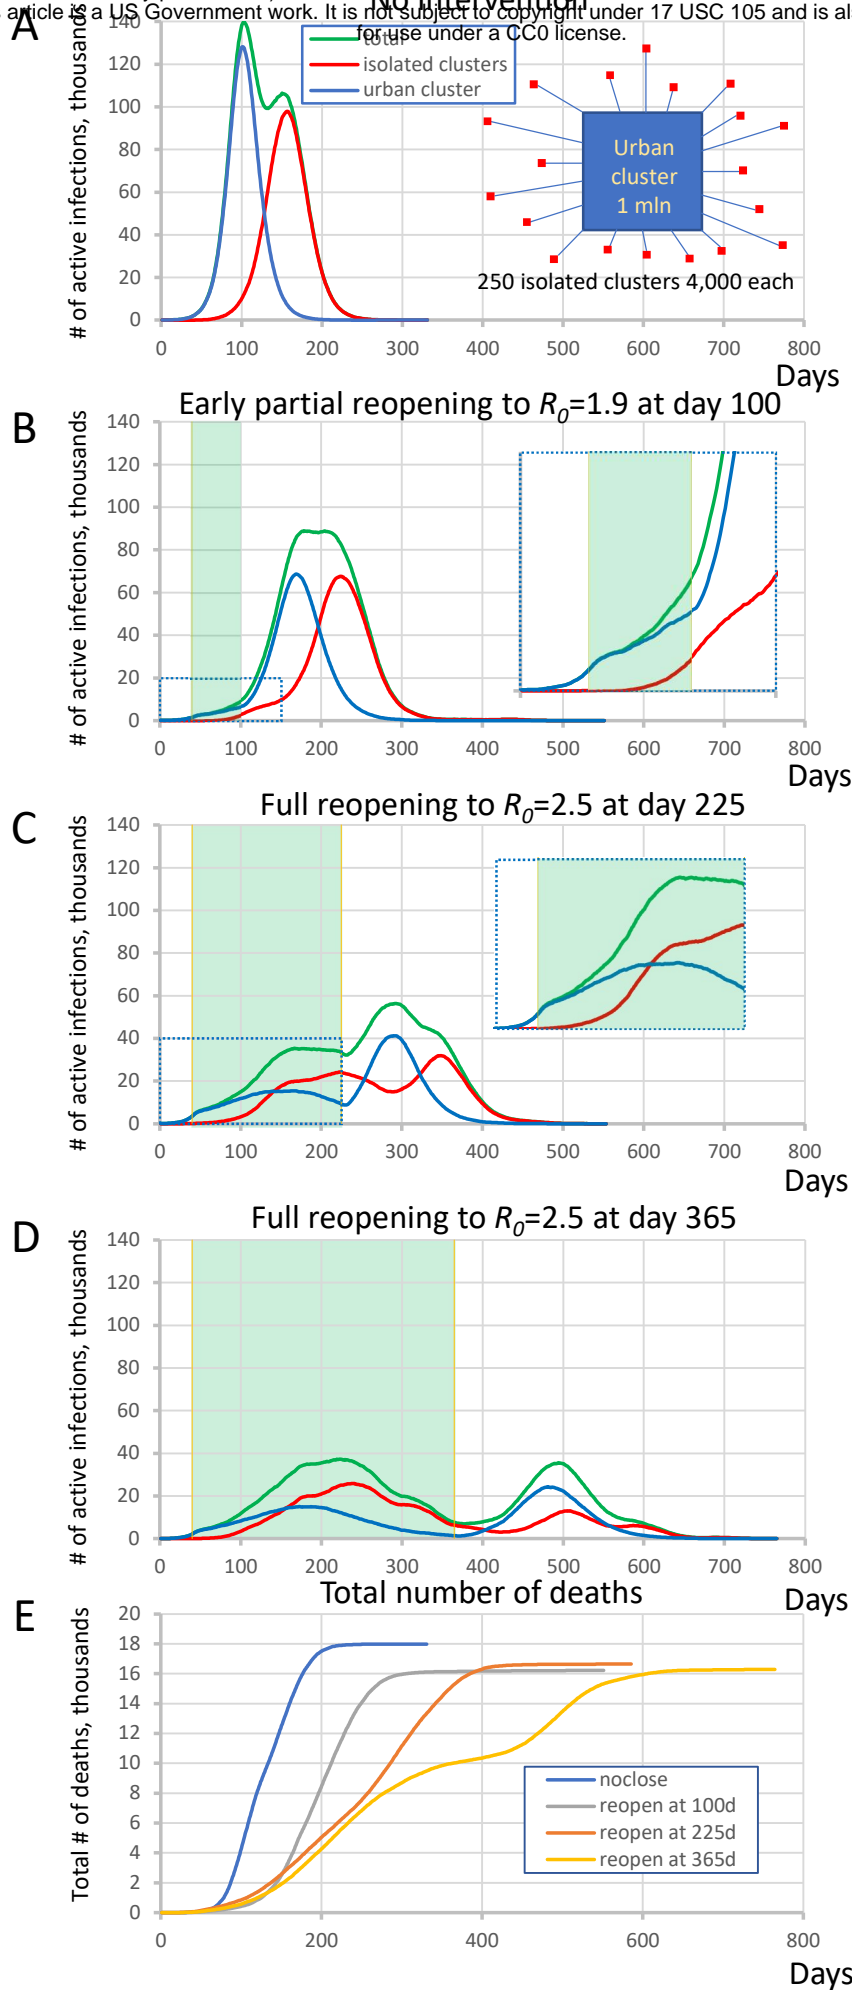

Figure 1

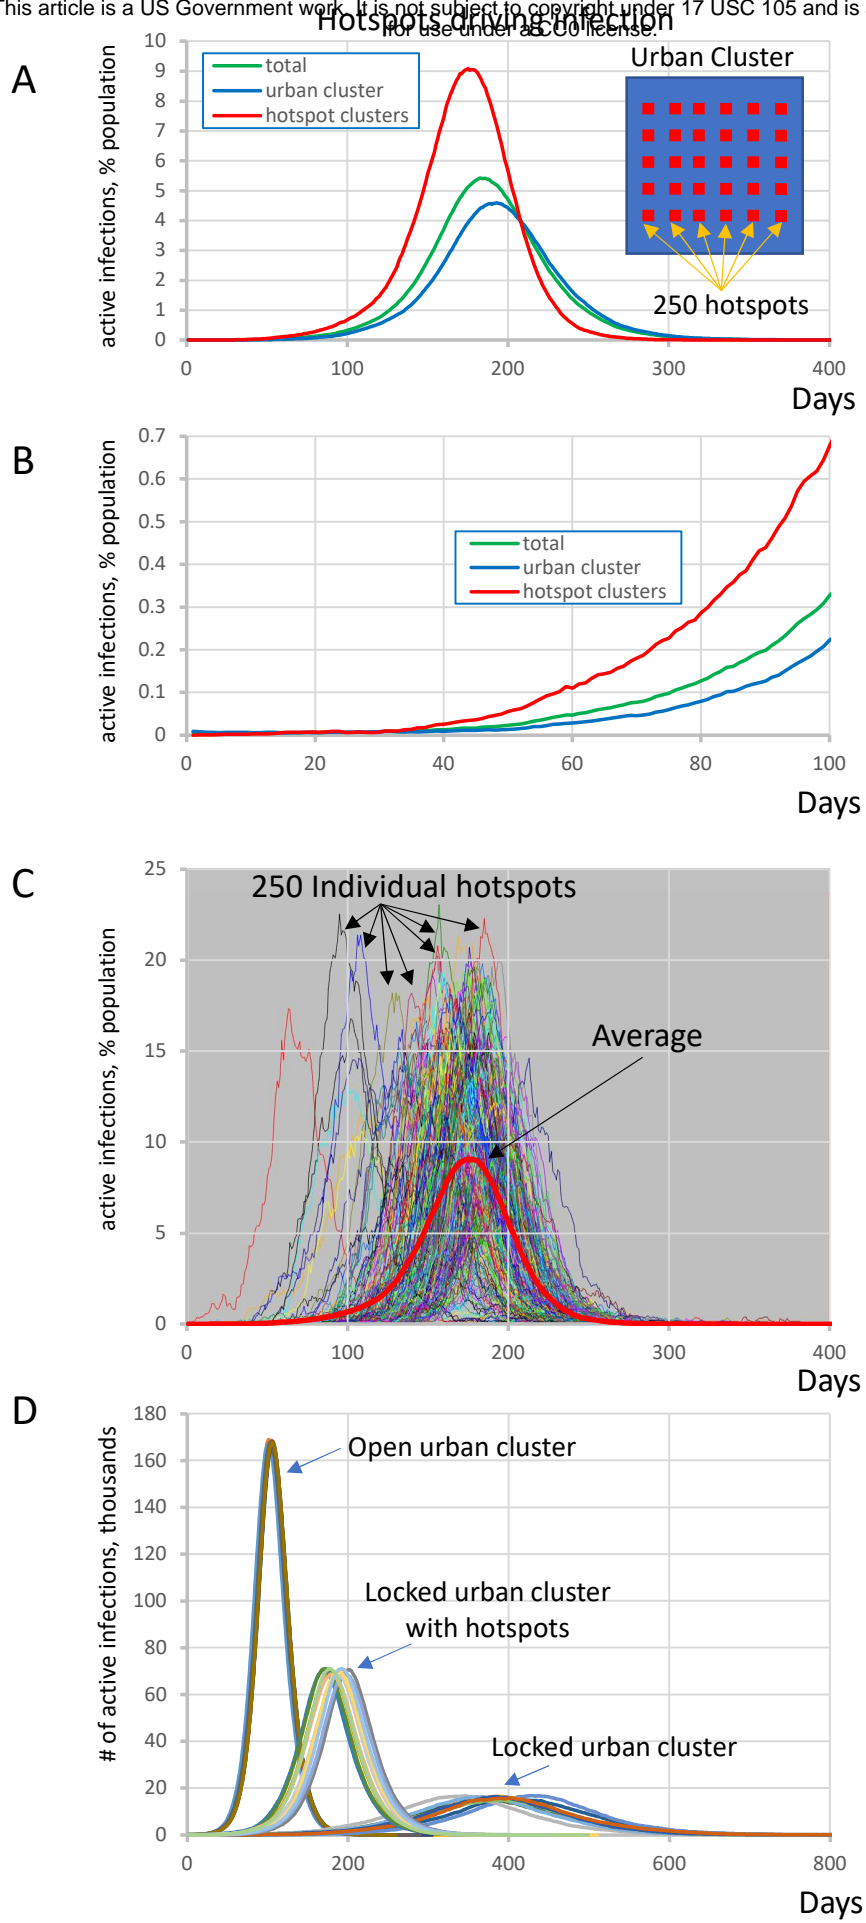

Figure 2

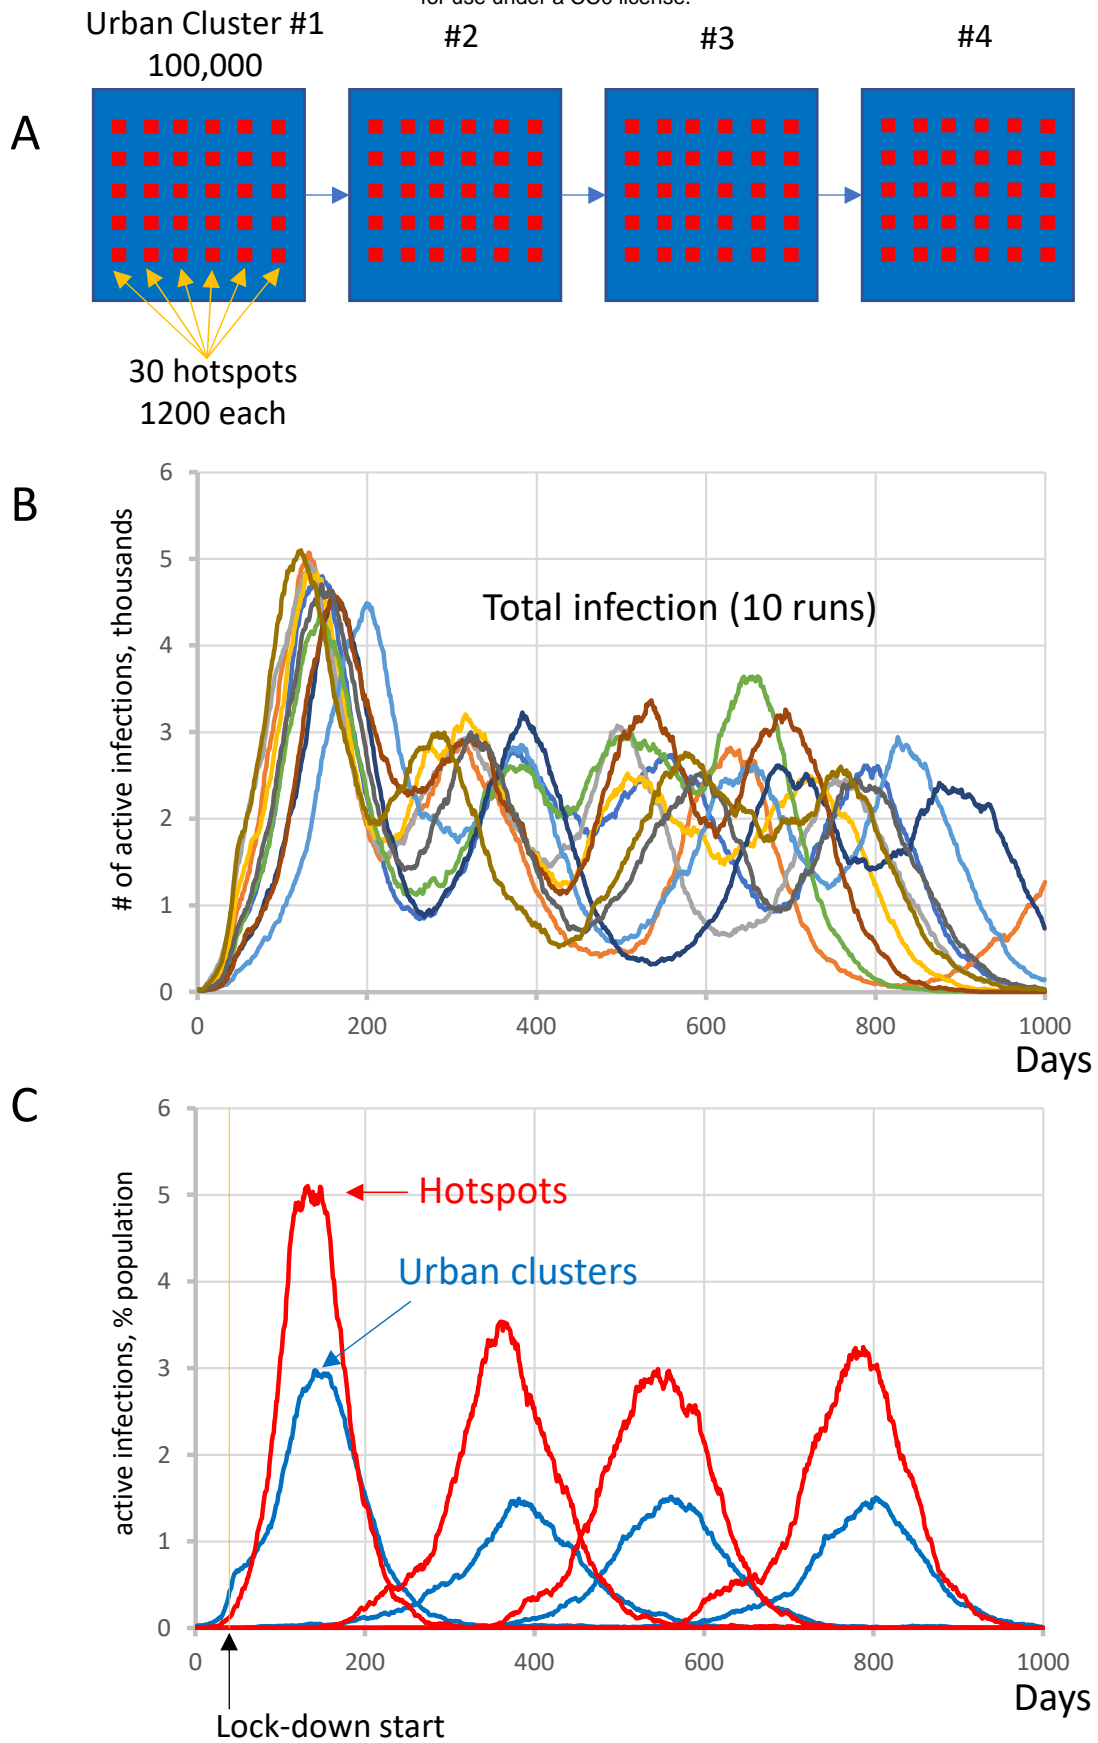

Figure 3

Urban cluster closed to  $R_0=1.05$  at day 0 and reopens to  $R_0=2.5$  at day 360

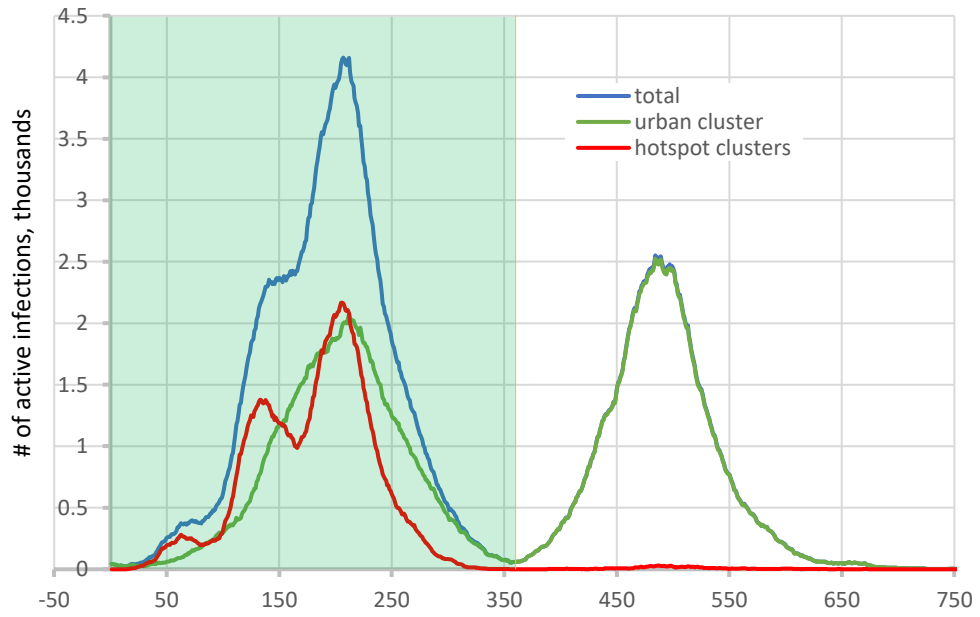

Figure 4



Supplementary Information for

**Social heterogeneity drives complex patterns of the COVID-19 pandemic: insights  
from a novel Stochastic Heterogeneous Epidemic Model (SHEM)**

Alexander V. Maltsev and Michael D. Stern\*

*\*Corresponding Author:*

Michael D. Stern,

Email: [SternMi@mail.nih.gov](mailto:SternMi@mail.nih.gov)

**This PDF file includes:**

Figures S1 – S3  
Legends for Movies S1 and S2

**Other supplementary materials for this manuscript include the following:**

Movies S1 and S2

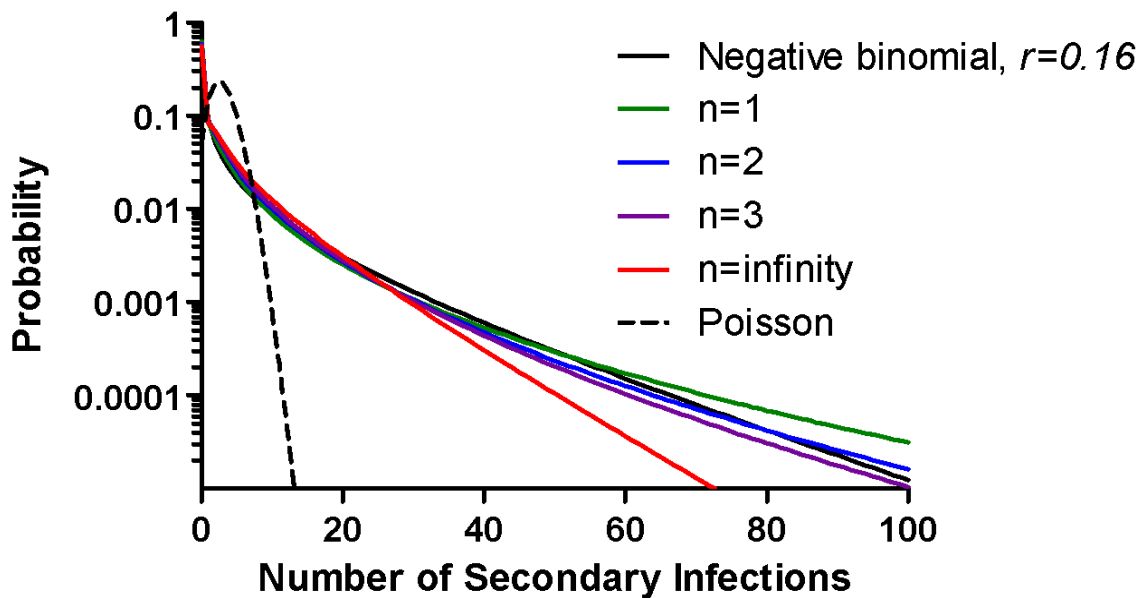

**Fig. S1. The distribution of secondary infections generated by infectious individuals.**

Black: Observed negative binomial distribution (Althouse, B. M., et al. 2020; "Stochasticity and heterogeneity in the transmission dynamics of SARS-CoV-2." <https://arxiv.org/abs/2005.13689>); Green, blue, magenta, red: The actual realized number of secondary cases generated over the lifetime of one infection in the presence of  $n$  other infectious individuals according to our scheme. All distributions have mean  $R_0 = 3.0$ . Dashed line: Poisson distribution with mean  $R_0$  as implicit in mean-field SEIR models.

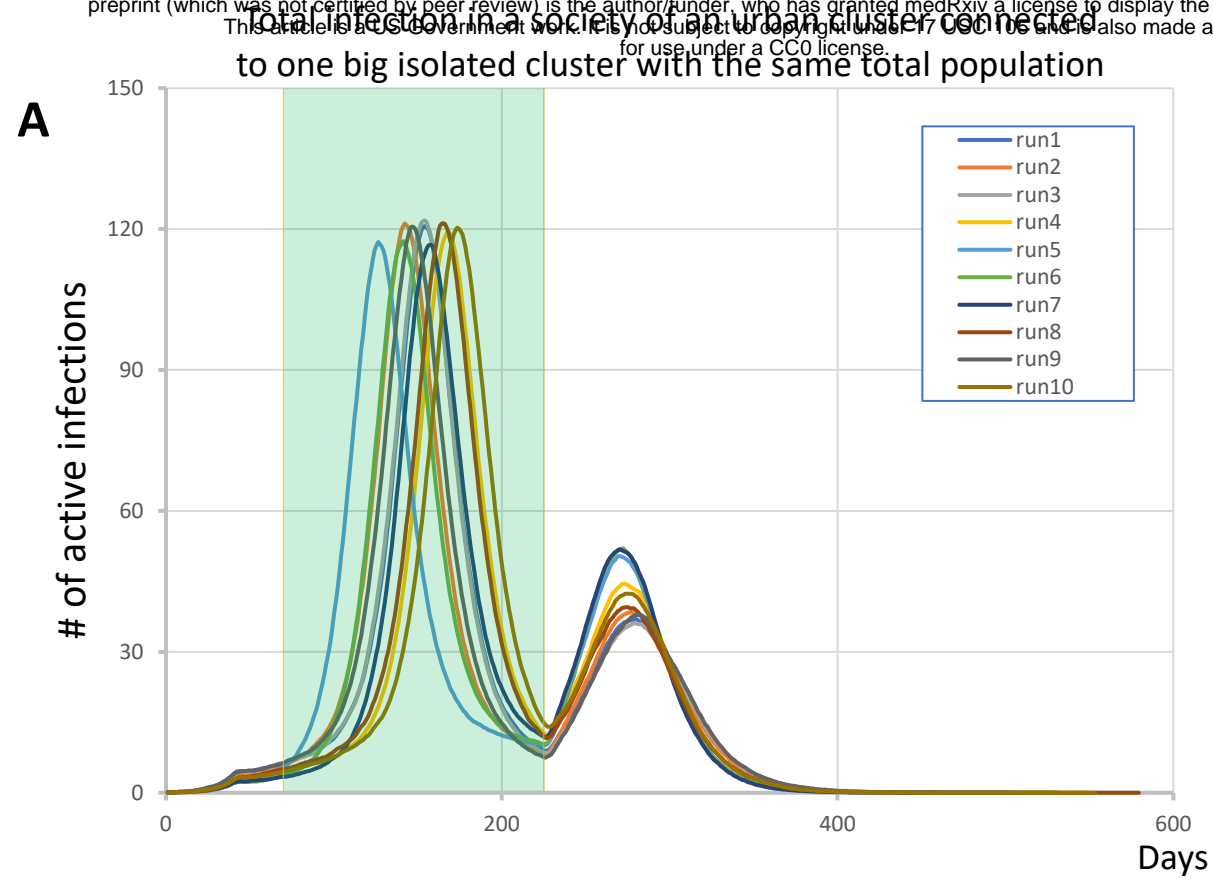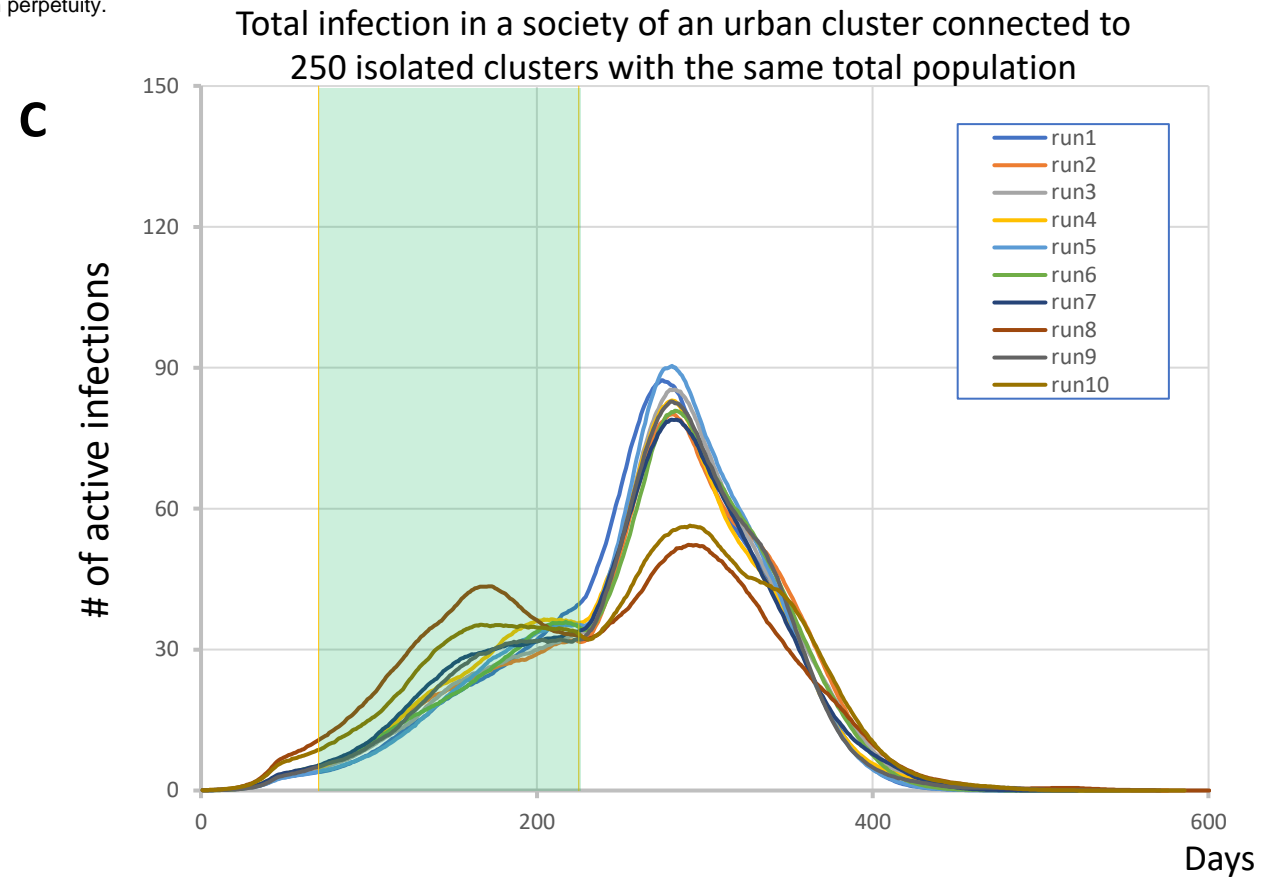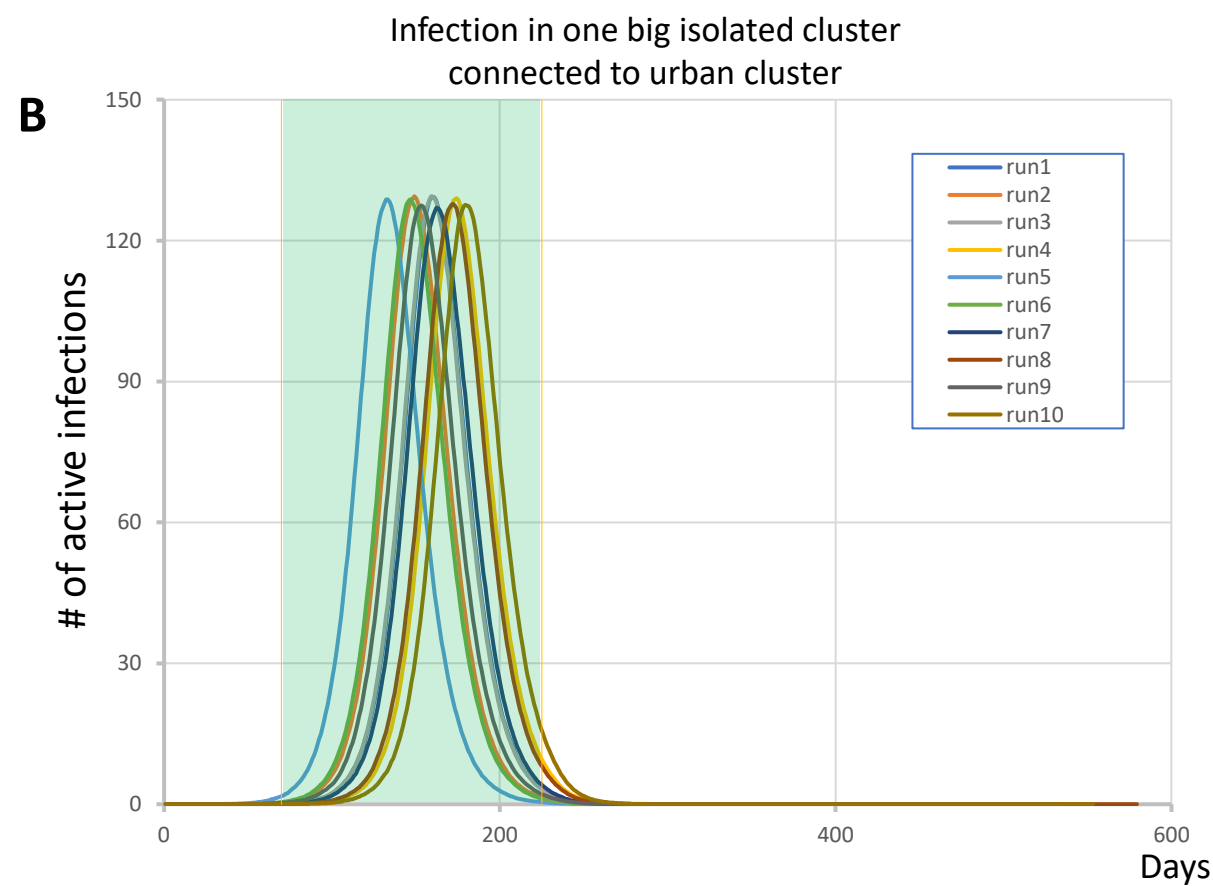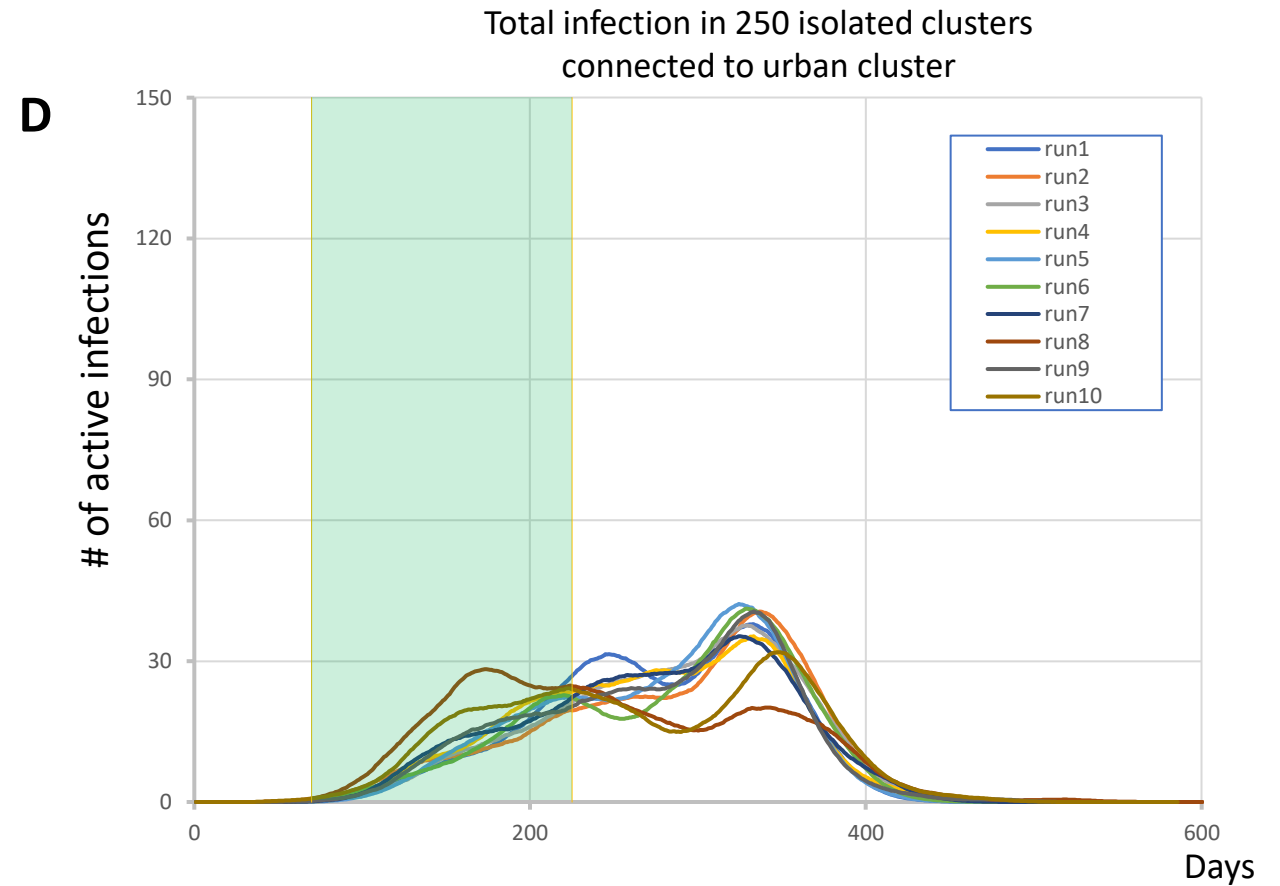

**Fig. S2. Heterogeneity of isolated clusters is important for the infection pattern.** In the most complex scenario of “moderate lockdown” (Fig. 1C in main text) we substituted 250 clusters by one big cluster with the same population of one million people keeping all other parameters the same. The big isolated cluster generated substantial and sharp infection peak (**panels A and B**) that is absent or very small in case of 250 isolated clusters (**panels C and D**). Each panel shows 10 simulation runs (overlapped multi-color curves). The lockdown period from day 40 to day 225 is shown by green shade.

### Infection in 30 individual hotspots in each urban cluster

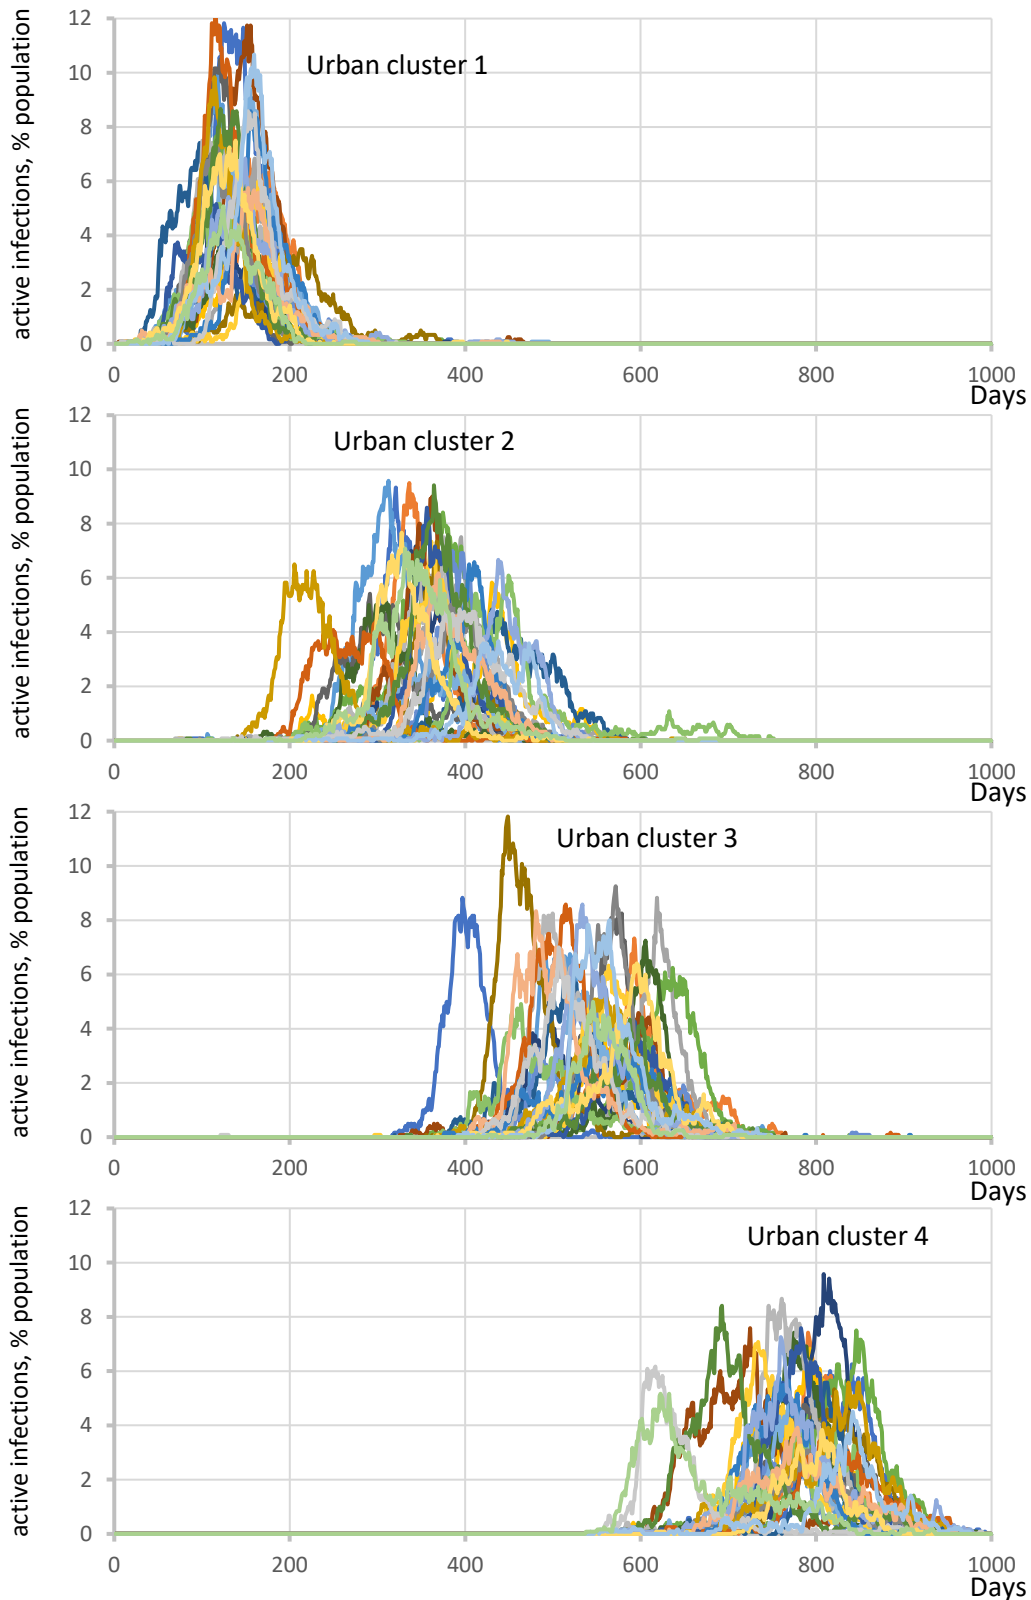

**Fig. S3.** Stochastic propagation of infection from one urban area to another via hotspots in a society of 4 connected urban areas, each in lockdown but having hotspots. Each plot from top to bottom shows infection explosions in each individual hotspot for each urban area (specified by labels). See main text for details and also Movie S2.

**Movie S1 (separate file). Highly susceptible integrated clusters (hotspots) drive SARS-Cov2 infection in an urban cluster in stochastic simulations of SHERM model.** Infection time-dependent changes in hotspots (small squares) are coded by red shades saturating (pure red) at 5% of infection in each individual cluster. Infection in the urban area (big square) are is coded by blue shades saturating (pure blue) at 5% of infection in the area. The time is shown in the left upper corner in number of days. Large urban cluster had 1 million individuals with  $R_0 = 1.25$  while 250 hotspot clusters with 1200 +/- 500 people had the same internal  $R_0 = 3.0$ .

**Movie S2 (separate file). Hotspots drive SARS-Cov2 infection in each urban cluster and infection propagation among urban clusters in stochastic simulations of SHERM model in a society of 4 connected urban areas.** Time-dependent changes of infection in hotspots (small squares) are coded by red shades saturating (pure red) at 3% of infection in each individual cluster. Infection in the urban area (big square) is coded by blue shades saturating (pure blue) at 3% of infection in the area. The time is shown in the left upper corner in number of days. Each urban area of 100,000 people at day 40 became closed from  $R_0 = 2.5$  to  $R_0 = 1.25$  at day 40. Each urban area has 30 hotspots with 1200 +/- 500 people that avoid closing and keep the same internal  $R_0 = 2$ .
